# Supplementary material for: Synthesis and characterization of bridged bis(amidato) rare earth metal amides and their applications in C–N bond formation reactions
Source: Royal Society of Chemistry journal article supplement (doi:10.1039/c5dt04217h), 2016-01-01

## Supporting Information

# Synthesis and characterization of bridged bis(amidato) rare earth metal amides and their applications in C-N bond formation

Bei Zhao\*, Yang Xiao, Dan Yuan, Chengrong Lu, Yingming Yao\*

Key Laboratory of Organic Synthesis of Jiangsu Province, College of Chemistry, Chemical Engineering and Materials Science, Soochow University, Suzhou 215123, PR China

| <b>Table of contents</b>                                                                                     | <b>Page</b> |
|--------------------------------------------------------------------------------------------------------------|-------------|
| 1. Table 1 Details of Crystallographic data for complexes                                                    | S-2         |
| 2. Molecular structures of bridged bisamidato rare earth metal amides, selected bond lengths and bond angles | S-4         |
| 3. Spectral data for the amides                                                                              | S-7         |
| 4. Spectral data for the guanidines                                                                          | S-11        |
| 5. NMR spectra for ligands                                                                                   | S-15        |
| 6. NMR spectra for complexes                                                                                 | S-18        |
| 7. NMR spectra for amides                                                                                    | S-21        |
| 8. NMR spectra for guanidines                                                                                | S-31        |

*Table 1 Details of crystallographic data.*

|                                 | <b>3·Tol</b>                                     | <b>5·2THF</b>                                              | <b>6·2Hex</b>                                              | <b>(7·2Tol)<sub>2</sub></b>                         | <b>8·2Tol</b>                                    |
|---------------------------------|--------------------------------------------------|------------------------------------------------------------|------------------------------------------------------------|-----------------------------------------------------|--------------------------------------------------|
| Formula                         | C <sub>65</sub> H <sub>100</sub> Nd <sub>2</sub> | C <sub>70</sub> H <sub>116</sub> La                        | C <sub>74</sub> H <sub>128</sub> Nd                        | C <sub>152</sub> H <sub>236</sub> La <sub>4</sub> N | C <sub>76</sub> H <sub>118</sub> Nd <sub>2</sub> |
|                                 | N <sub>6</sub> O <sub>4</sub> Si <sub>4</sub>    | <sub>2</sub> N <sub>6</sub> O <sub>6</sub> Si <sub>4</sub> | <sub>2</sub> N <sub>6</sub> O <sub>4</sub> Si <sub>4</sub> | <sub>16</sub> O <sub>8</sub> Si <sub>8</sub>        | N <sub>8</sub> O <sub>4</sub> Si <sub>4</sub>    |
| Fw                              | 1428.48                                          | 1527.87                                                    | 1566.44                                                    | 3193.30                                             | 1608.62                                          |
| <i>T</i> (K)                    | 293(2)                                           | 253(2)                                                     | 293(2)                                                     | 223(2)                                              | 223(2)                                           |
| Crystalsyst                     | Monoclinic                                       | Monoclinic                                                 | Monoclinic                                                 | Monoclinic                                          | Triclinic                                        |
| Space group                     | C12/c1                                           | P12/c1                                                     | P1c1                                                       | P21/n                                               | P-1                                              |
| Crystal size (mm <sup>3</sup> ) | 1.40×0.80×0.80                                   | 0.50×0.40×0.40                                             | 0.75×0.60×0.40                                             | 0.50×0.30×0.20                                      | 0.30×0.20×0.20                                   |
| <i>a</i> (Å)                    | 20.64(4)                                         | 13.89(1)                                                   | 13.84(1)                                                   | 16.70(1)                                            | 12.38(1)                                         |
| <i>b</i> (Å)                    | 19.89(2)                                         | 11.7360(3)                                                 | 11.67(1)                                                   | 17.83(1)                                            | 12.68(1)                                         |
| <i>c</i> (Å)                    | 20.36(2)                                         | 24.69(1)                                                   | 24.69(1)                                                   | 27.92(1)                                            | 14.02(1)                                         |
| <i>α</i> (°)                    | 90                                               | 90                                                         | 90                                                         | 90                                                  | 83.14(3)                                         |
| <i>β</i> (°)                    | 116.44(2)                                        | 103.73(1)                                                  | 103.91(1)                                                  | 104.87(1)                                           | 74.52(3)                                         |
| <i>γ</i> (°)                    | 90                                               | 90                                                         | 90                                                         | 90                                                  | 72.32(3)                                         |
| <i>V</i> (Å <sup>3</sup> )      | 7482(16)                                         | 3909.4(2)                                                  | 3872.0(1)                                                  | 8037.9(3)                                           | 2020.3(8)                                        |

|                                               |                   |                   |                   |               |                   |
|-----------------------------------------------|-------------------|-------------------|-------------------|---------------|-------------------|
| <i>Z</i>                                      | 4                 | 2                 | 2                 | 4             | 1                 |
| <i>D</i> <sub>calc</sub> (g/cm <sup>3</sup> ) | 1.230             | 1.298             | 1.320             | 1.206         | 1.316             |
| $\mu$ (mm <sup>-1</sup> )                     | 1.479             | 1.188             | 1.436             | 1.152         | 1.379             |
| <i>F</i> (000)                                | 2784              | 1592              | 1588              | 3010          | 830               |
| $\theta$ range (°)                            | 2.85-26.37        | 3.02-<br>25.00    | 3.03-<br>25.00    | 3.02-26.37    | 2.85-25.00        |
| Collected                                     | 16113             | 21353             | 20595             | 58323         | 17119             |
| Unique<br>reflns                              | 7539              | 6880              | 11148             | 16402         | 7100              |
| R [I > 2 $\sigma$<br>(I)]                     | 0.0412            | 0.0412            | 0.0389            | 0.0456        | 0.0338            |
| wR                                            | 0.1809            | 0.1089            | 0.1016            | 0.1190        | 0.0527            |
| R <sub>int</sub>                              | 0.0412            | 0.0382            | 0.0225            | 0.0417        | 0.0256            |
| GOF                                           | 1.091             | 1.083             | 1.071             | 1.059         | 1.093             |
| peak/hole<br>(e/Å <sup>3</sup> )              | 1.587, -<br>1.469 | 1.632, -<br>0.861 | 1.131, -<br>1.321 | 1.458, -1.450 | 0.631, -<br>0.418 |

---

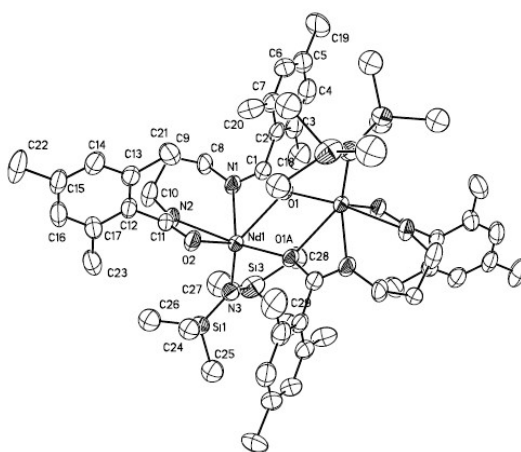

Fig. 1 Molecular structure of complex **3**·toluene. Hydrogen atoms and toluene molecules are omitted for clarity. Selected bond lengths (Å): Nd(1)-N(3) 2.312(8), Nd(1)-N(2) 2.430(8), Nd(1)-N(1) 2.491(7), Nd(1)-O(2) 2.397(6), Nd(1)-O(1) 2.554(5), Nd(1A)-O(1) 2.384(6), N(1)-C(1) 1.263(11), N(2)-C(11) 1.274(11), O(1)-C(1) 1.313(9), O(2)-C(11) 1.308(10); bond angles (°): Nd(1)-O(1)-C(1) 93.1(5), O(1)-C(1)-N(1) 117.2(8), C(1)-N(1)-Nd(1) 97.4(5), N(1)-Nd(1)-O(1) 51.7(2), Nd(1)-O(2)-C(11) 94.1(5), O(2)-C(11)-N(2) 117.5(7), C(11)-N(2)-Nd(1) 93.5(5), N(2)-Nd(1)-O(2) 54.4(2), O(1A)-Nd(1)-N(2) 144.7(2), N(3)-Nd(1)-O(1) 124.8(3), O(1)-Nd(1)-O(1A) 68.9(2), O(1)-Nd(1)-O(2) 115.6(2).

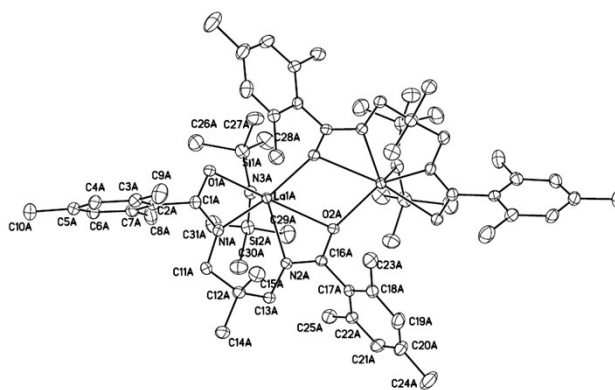

Fig. 2 Representative molecular structure of complex **5**·2THF. Hydrogen atoms, and THF molecules are omitted for clarity. Bond lengths (Å): La(1A)-O(1A) 2.471(3), La(1A)-

O(2A) 2.706(3), La(1A)-O(2) 2.426(3), La(1A)-N(1A) 2.492(3), La(1A)-N(2A) 2.579(3), La(1A)-N(3A) 2.360(4), O(1A)-C(1A) 1.296(5), O(2A)-C(16A) 1.320(5), N(1A)-C(1A) 1.298(5), N(1)-C(11) 1.456(5), N(2A)-C(16A) 1.462(5), N(2A)-C(16A) 1.288(5); Angles (°): O(2)-La(1)-O(2A) 67.0(1), O(1A)-La(1A)-N(1A) 53.0(1), O(2A)-La(1A)-N(2A) 49.5(1), N(1A)-La(1A)-N(2A) 67.6(1), O(1A)-C(1A)-N(1A) 117.3(4), O(2A)-C(16A)-N(2A) 116.3(4).

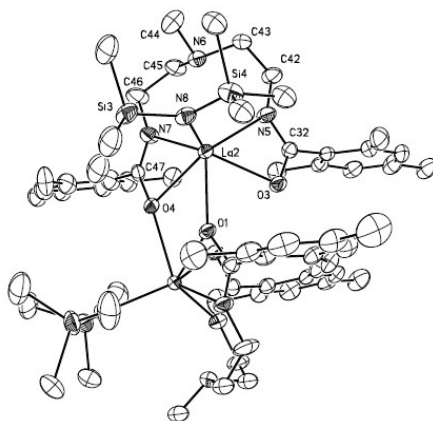

Fig. 3 Molecular structure of one independent molecule of complex 7·2toluene. Hydrogen atoms and toluene molecules are omitted for clarity. Bond lengths (Å): La(2)-O(1) 2.467(3), La(2)-O(3) 2.507(3), La(2)-O(4) 2.761(3), La(2)-N(5) 2.498(4), La(2)-N(7) 2.524(4), La(2)-N(8) 2.397(4), O(3)-C(32) 1.288(6), O(4)-C(47) 1.301(5), N(5)-C(32) 1.303(6), N(7)-C(47) 1.285(6); Angles (°): O(1)-La(2)-O(4) 66.89(10), N(5)-La(2)-O(3) 52.08(12), N(7)-La(2)-O(4) 48.90(12), O(3)-C(32)-N(5) 116.0(4), N(7)-C(47)-O(4) 116.4(4).

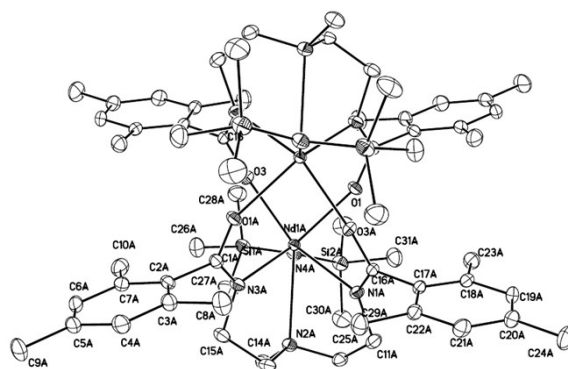

Fig. 4 Molecular structure of complex **8**·2toluene. Hydrogen atoms and toluene molecules are omitted for clarity. Bond lengths (Å): Nd(1A)-O(1) 2.336(2), Nd(1A)-O(3) 2.356(2), Nd(1A)-N(1A) 2.435(2), Nd(1A)-N(2A) 2.819(2), Nd(1A)-N(3A) 2.557(2), Nd(1A)-N(4A) 2.394(2), N(1A)-C(1A) 1.307(3), N(3A)-C(16A) 1.294(3), O(1A)-C(1A) 1.283(3), O(3A)-C(16A) 1.299(3); Angles (°): O(1A)-Nd(1A)-O(3A) 82.37(6), O(1A)-Nd(1A)-N(1A) 136.38(6), N(3A)-Nd(1A)-N(1A) 82.48(7), O(1A)-C(1A)-N(1A) 121.70(2).

*Spectral data for the amides:*

***N*-Benzyl-*N*-methylbenzamide (11a):**  $^1\text{H}$  NMR (400 MHz,  $\text{CDCl}_3$ ):  $\delta$  7.51-7.15 (m, 10H, ArH), 4.79 (s, 1H,  $\text{CH}_2$ ), 4.54 (s, 1H,  $\text{CH}_2$ ), 2.97 (3H,  $\text{CH}_3$ ) ppm. HRMS (ESI, m/z) calcd for  $\text{C}_{15}\text{H}_{16}\text{NONa}^+$ : 248.1051, found: 248.1052.

***N*-Benzyl-4-methoxy-*N*-methylbenzamide (11b):**  $^1\text{H}$  NMR (400 MHz,  $\text{CDCl}_3$ ):  $\delta$  7.44-6.79 (m, 9H, ArH), 4.67 (s, 1H,  $\text{CH}_2$ ), 4.57 (s, 1H,  $\text{CH}_2$ ), 3.78 (s, 3H,  $\text{CH}_3\text{O}$ ), 2.93 (s, 3H,  $\text{CH}_3$ ) ppm. HRMS (ESI, m/z) calcd for  $\text{C}_{16}\text{H}_{17}\text{NO}_2\text{Na}^+$ : 278.1157, found: 278.1159.

***N*-Benzyl-*N*-methyl-4-fluorobenzamide (11c):**  $^1\text{H}$  NMR (400 MHz,  $\text{CDCl}_3$ ):  $\delta$  7.50-7.02 (m, 9H, ArH), 4.72 (s, 1H,  $\text{CH}_2$ ), 4.50 (s, 1H,  $\text{CH}_2$ ), 3.0 (s, 1.5H,  $\text{CH}_3$ ), 2.85 (s, 1.5H,  $\text{CH}_3$ ) ppm. HRMS (ESI, m/z) calcd for  $\text{C}_{15}\text{H}_{15}\text{FNONa}^+$ : 266.0957, found: 266.0956.

***N*-Benzyl-*N*,4-dimethylbenzamide (11d):**  $^1\text{H}$  NMR (400 MHz,  $\text{CDCl}_3$ ):  $\delta$  7.40-7.20 (m, 9H, ArH), 4.77 (s, 1H,  $\text{CH}_2$ ), 4.55 (s, 1H,  $\text{CH}_2$ ), 3.00 (s, 1.5H,  $\text{ArCH}_3$ ), 2.89 (s, 1.5H,  $\text{ArCH}_3$ ), 2.37 (s, 3H,  $\text{NCH}_3$ ) ppm. HRMS (ESI, m/z) calcd for  $\text{C}_{16}\text{H}_{17}\text{NONa}^+$ : 262.1208, found: 262.1208.

**Morpholino(phenyl)methanone (11e):**  $^1\text{H}$  NMR (400 MHz,  $\text{CDCl}_3$ ):  $\delta$  7.41-7.35 (m, 5H, ArH), 3.73-3.43 (m, 8H,  $\text{CH}_2$ ) ppm. HRMS (ESI, m/z) calcd for  $\text{C}_{11}\text{H}_{13}\text{NO}_2\text{Na}^+$ : 214.0844, found: 214.0839.

**Morpholino(*p*-tolyl)methanone (11f):**  $^1\text{H}$  NMR (400 MHz,  $\text{CDCl}_3$ ):  $\delta$  7.31-7.19 (m, 4H, ArH), 3.68 (s, 8H,  $\text{CH}_2$ ), 2.37 (s, 3H,  $\text{CH}_3$ ) ppm. HRMS (ESI, m/z) calcd for  $\text{C}_{12}\text{H}_{15}\text{NO}_2\text{Na}^+$ : 228.1000, found: 228.1007.

**(4-Fluorophenyl)(morpholino)methanone (11g):**  $^1\text{H}$  NMR (400 MHz,  $\text{CDCl}_3$ ):  $\delta$  7.38

(ddd,  $J = 8.5, 5.3, 1.6$  Hz, 2H, ArH), 7.06 (td,  $J = 8.6, 1.7$  Hz, 2H, ArH), 3.66-3.49(m, 3H, CH<sub>2</sub>) ppm. HRMS (ESI, m/z) calcd for C<sub>11</sub>H<sub>12</sub>FNO<sub>2</sub>Na<sup>+</sup>: 232.0750, found: 232.0740.

**(4-Chlorophenyl)(morpholino)methanone (11h):** <sup>1</sup>H NMR (400 MHz, CDCl<sub>3</sub>):  $\delta$  7.37-7.30 (m, 4H, ArH), , 3.66-3.42 (m, 8H,CH<sub>2</sub>) ppm. HRMS (ESI, m/z) calcd for C<sub>11</sub>H<sub>12</sub>ClNO<sub>2</sub>H<sup>+</sup>: 226.0635, found: 226.0631.

**(3-Chlorophenyl)(morpholino)methanone (11i):** <sup>1</sup>H NMR (400 MHz, CDCl<sub>3</sub>):  $\delta$  7.38-7.21 (m, 4H, ArH), 3.76-3.32 (m, 8H, CH<sub>2</sub>) ppm. HRMS (ESI, m/z) calcd for C<sub>11</sub>H<sub>12</sub>ClNO<sub>2</sub>H<sup>+</sup>: 226.0635, found: 226.0639.

**(2-Chlorophenyl)(morpholino)methanone (11j):** <sup>1</sup>H NMR (400 MHz, CDCl<sub>3</sub>):  $\delta$  7.40-7.25 (m, 4H, ArH), 3.89-3.72 (m, 4H, CH<sub>2</sub>), 3.70-3.53 (m, 2H, CH<sub>2</sub>), 3.30-3.15 (m, 2H, CH<sub>2</sub>) ppm. HRMS (ESI, m/z) calcd for C<sub>11</sub>H<sub>12</sub>ClNO<sub>2</sub>H<sup>+</sup>: 226.0635, found: 226.0648.

**Morpholino(4-nitrophenyl)methanone (11k):** <sup>1</sup>H NMR (400 MHz, CDCl<sub>3</sub>):  $\delta$  8.29-8.24 (m, 2H, ArH), 7.58-7.54 (m, 2H, ArH), 3.83-3.31 (m, 8H, CH<sub>2</sub>) ppm. HRMS (ESI, m/z) calcd for C<sub>11</sub>H<sub>12</sub>N<sub>2</sub>O<sub>4</sub>H<sup>+</sup>: 237.0875, found: 237.0873.

**N-Benzoylpyrrolidine (11l):** <sup>1</sup>H NMR (400 MHz, CDCl<sub>3</sub>):  $\delta$  7.51 -7.35 (m, 5H, ArH), 3.62 (t,  $J = 7.0$  Hz, 2H, CH<sub>2</sub>-N), 3.39 (t,  $J = 6.6$  Hz, 2H, CH<sub>2</sub>-N), 1.97-1.90 (m, 2H, CH<sub>2</sub>), 1.88-1.80 (m, 2H, CH<sub>2</sub>) ppm. HRMS (ESI, m/z) calcd for C<sub>11</sub>H<sub>13</sub>NONa<sup>+</sup>: 198.0895, found: 198.0897.

**Phenyl(piperidin-1-yl)methanone (11m):** <sup>1</sup>H NMR (400 MHz, CDCl<sub>3</sub>):  $\delta$  7.37 (m, 5H, ArH), 3.70 (s, 2H, CH<sub>2</sub>-N), 3.32 (s, 2H, CH<sub>2</sub>-N), 1.66-1.50 (m, 6H, CH<sub>2</sub>) ppm. HRMS (ESI, m/z) calcd for C<sub>12</sub>H<sub>15</sub>NONa<sup>+</sup>: 212.1051, found: 212.1055.



**N-Phenylbenzamide (11n):**  $^1\text{H}$  NMR (400 MHz,  $\text{CDCl}_3$ ):  $\delta$  8.02-7.06 (m, 10H, ArH) ppm. HRMS (ESI, m/z) calcd for  $\text{C}_{13}\text{H}_{11}\text{NONa}^+$ : 220.0738, found: 220.0728.

**Indolin-1-yl(phenyl)methanone (11o):**  $^1\text{H}$  NMR (400 MHz,  $\text{CDCl}_3$ ):  $\delta$  7.67-6.92 (m, 9H, ArH), 4.06 (s, 2H,  $\text{CH}_2$ ), 3.10 (t,  $J = 8.3$  Hz, 2H,  $\text{CH}_2$ ) ppm. HRMS (ESI, m/z) calcd for  $\text{C}_{15}\text{H}_{13}\text{NONa}^+$ : 246.0895, found: 246.0889.

**(2-Methylindolin-1-yl)(phenyl)methanone (11p):**  $^1\text{H}$  NMR (400 MHz,  $\text{CDCl}_3$ ):  $\delta$  7.61-6.89 (m, 9H, ArH), 4.76 (s, 1H, CH), 3.43-2.65 (m, 2H,  $\text{CH}_2$ ), 1.26 (s, 3H,  $\text{CH}_3$ ) ppm. HRMS (ESI, m/z) calcd for  $\text{C}_{16}\text{H}_{15}\text{NONa}^+$ : 260.1051, found: 260.1044.

**7-Methylindolin-1-yl(*p*-tolyl)methanone (11q):**  $^1\text{H}$  NMR (400 MHz,  $\text{CDCl}_3$ ):  $\delta$  7.44-7.00 (m, 8H, ArH), 4.05 (s, 2H,  $\text{CH}_2$ ), 3.04 (t,  $J = 8.2$  Hz, 2H,  $\text{CH}_2$ ), 2.39 (m, 2H,  $\text{CH}_2$ ), 2.28 (s, 3H,  $\text{CH}_3$ ) ppm. HRMS (ESI, m/z) calcd for  $\text{C}_{17}\text{H}_{17}\text{NONa}^+$ : 274.1208, found: 274.1210.

**Piperazine-1,4-diylbis(phenylmethanone) (11r):**  $^1\text{H}$  NMR (400 MHz,  $\text{CDCl}_3$ ):  $\delta$  7.37 (s, 10H, ArH), 3.60 (m, 8H,  $\text{CH}_2$ ). HRMS (ESI, m/z) calcd for  $\text{C}_{18}\text{H}_{18}\text{N}_2\text{O}_2\text{Na}^+$ : 317.1266, found: 317.1259.

**Piperazine-1,4-diylbis(*p*-tolylmethanone) (11s):**  $^1\text{H}$  NMR (400 MHz, DMSO):  $\delta$  7.24-7.32 (m, 8H, ArH), 3.51 (m, 8H,  $\text{CH}_2$ ), 2.33 (s, 6H,  $\text{CH}_3$ ). HRMS (ESI, m/z) calcd for  $\text{C}_{20}\text{H}_{22}\text{N}_2\text{O}_2\text{Na}^+$ : 345.1579, found: 345.1576.

**Piperazine-1,4-diylbis((4-chlorophenyl)methanone) (11t):**  $^1\text{H}$  NMR (400 MHz, DMSO):  $\delta$  7.45-7.53 (m, 8H, ArH), 3.53 (m, 8H,  $\text{CH}_2$ ). HRMS (ESI, m/z) calcd for  $\text{C}_{18}\text{H}_{16}\text{Cl}_2\text{N}_2\text{O}_2\text{H}^+$ : 363.0667, found: 363.0660.

*Spectral data for the guanidines:*

**1,3-Diisopropyl-2-phenylguanidine (13a):**  $^1\text{H}$  NMR (400 MHz,  $\text{CDCl}_3$ ):  $\delta$  7.25-6.83 (m, 5H, ArH), 3.75 (s, 2H, CH), 3.57 (s, 2H, NH), 1.14 (d,  $J = 6.3$  Hz, 12H,  $\text{CH}_3$ ). HRMS (ESI):  $m/z$  calcd for  $\text{C}_{13}\text{H}_{21}\text{N}_3\text{H}^+$ : 220.1814, found: 220.1819.

**2-(4-Fluorophenyl)-1,3-diisopropylguanidine (13b):**  $^1\text{H}$  NMR (400 MHz,  $\text{CDCl}_3$ ):  $\delta$  6.94-6.74 (m, 4H, ArH), 3.73 (s, 2H, CH), 3.50 (s, 2H, NH), 1.14 (d,  $J = 6.3$  Hz, 12H,  $\text{CH}_3$ ). HRMS (ESI):  $m/z$  calcd for  $\text{C}_{13}\text{H}_{20}\text{FN}_3\text{H}^+$ : 238.1720, found: 237.1716.

**2-(4-Chlorophenyl)-1,3-diisopropylguanidine (13c):**  $^1\text{H}$  NMR (400 MHz,  $\text{CDCl}_3$ )  $\delta$  7.17 (d,  $J = 8.5$  Hz, 2H, ArH), 6.75 (d,  $J = 8.5$  Hz, 2H, ArH), 3.76-3.68 (m, 2H, CH), 3.52 (s, 1H, NH), 1.13 (d,  $J = 6.3$  Hz, 12H,  $\text{CH}_3$ ). HRMS (ESI):  $m/z$  calcd for  $\text{C}_{13}\text{H}_{20}\text{ClN}_3\text{H}^+$ : 254.1424, found: 254.1426.

**2-(4-Bromophenyl)-1,3-diisopropylguanidine (13d):**  $^1\text{H}$  NMR (400 MHz,  $\text{CDCl}_3$ ):  $\delta$  7.31 (d,  $J = 8.4$  Hz, 2H, ArH), 6.71 (d,  $J = 8.4$  Hz, 2H, ArH), 4.14-3.58 (m, 2H, CH), 3.52 (s, 2H, NH), 1.14 (d,  $J = 6.3$  Hz, 12H,  $\text{CH}_3$ ). HRMS (ESI):  $m/z$  calcd for  $\text{C}_{13}\text{H}_{20}\text{BrN}_3\text{H}^+$ : 298.0919, found: 298.0931.

**1,3-Diisopropyl-2-(4-methoxyphenyl)guanidine (13e):**  $^1\text{H}$  NMR (400 MHz, ) :  $\delta$  6.78 (q,  $J = 9.0$  Hz, 4H, ArH), 3.66 (m, 5H,  $\text{OCH}_3$ , CH), 3.56 (s, 2H, NH), 1.14 (d,  $J = 6.1$  Hz,  $\text{CH}_3$ ). HRMS (ESI) :  $m/z$ : calcd for  $\text{C}_{14}\text{H}_{23}\text{N}_3\text{OH}^+$  :250.1919, found: 250.1930.

**1,3-Diisopropyl-2-(*p*-tolyl)guanidine (13f):**  $^1\text{H}$  NMR (400 MHz,  $\text{CDCl}_3$ ):  $\delta$  7.03 (d,  $J = 7.6$  Hz, 2H, ArH), 6.72 (d,  $J = 7.7$  Hz, 2H, ArH), 3.74 (s, 2H, CH), 3.53 (s, 2H, NH), 2.26 (s, 3H,  $\text{ArCH}_3$ ), 1.14 (d,  $J = 6.1$  Hz, 12H,  $\text{CH}_3$ ). HRMS (ESI) :  $m/z$ : calcd for  $\text{C}_{14}\text{H}_{23}\text{N}_3\text{H}^+$

:234.1970, found: 234.1972.

**1,3-Diisopropyl-2-(*m*-tolyl)guanidine (13g):**  $^1\text{H}$  NMR (400 MHz,  $\text{CDCl}_3$ ):  $\delta$  7.12-6.62 (m, 4H, ArH), 3.75-3.74 (m, 2H, CH), 3.55 (s, 2H, NH), 2.26 (s, 3H), 1.14 (d,  $J = 6.3$  Hz, 12H,  $\text{CH}_3$ ). HRMS (ESI) : m/z: calcd for  $\text{C}_{14}\text{H}_{23}\text{N}_3\text{H}^+$  :234.1970, found: 234.1982.

**1,3-Diisopropyl-2-(*o*-tolyl)guanidine (13h):**  $^1\text{H}$  NMR (400 MHz,  $\text{CDCl}_3$ ):  $\delta$  7.16 - 6.62 (m, 4H, ArH), 3.74 (s, 2H, CH), 2.12 (s, 3H, Ar- $\text{CH}_3$ ), 1.14 (d,  $J = 6.4$  Hz, 12H,  $\text{CH}_3$ ). HRMS (ESI): m/z: calcd for  $\text{C}_{14}\text{H}_{23}\text{N}_3\text{H}^+$  :234.1970, found: 234.1976.

**1,3-Diisopropyl-2-(pyridin-2-yl)guanidine (13i):**  $^1\text{H}$  NMR (400 MHz,  $\text{CDCl}_3$ ):  $\delta$  8.05-6.57 (m, 4H, ArH), 3.91 (m, 2H, CH), 1.22 (d,  $J = 6.4$  Hz, 12H,  $\text{CH}_3$ ). HRMS (ESI) : m/z: calcd for  $\text{C}_{12}\text{H}_{20}\text{N}_4\text{H}^+$  :221.1766, found: 221.1762.

**1,3-Diisopropyl-2-(naphthalen-1-yl)guanidine (13j):**  $^1\text{H}$  NMR (400 MHz,  $\text{CDCl}_3$ ):  $\delta$  8.33- 6.80 (m, 7H, ArH), 3.85 (dd,  $J = 11.4, 5.8$  Hz, 2H, CH), 3.62 (s, 2H, NH), 1.16 (d,  $J = 6.1$  Hz, 12H,  $\text{CH}_3$ ). HRMS (ESI): m/z calcd for  $\text{C}_{17}\text{H}_{23}\text{N}_3\text{H}^+$ : 270.1970, found: 270.1966.

**2-(2-(*tert*-butyl)phenyl)-1,3-diisopropylguanidine (13k):**  $^1\text{H}$  NMR (400 MHz,  $\text{CDCl}_3$ ):  $\delta$  7.88-5.57 (m, 4H, ArH), 3.81 (m, 2H, NH), 3.50 (d,  $J = 7.9$  Hz, 2H, CH), 1.36 (d,  $J = 1.2$  Hz, 9H,  $\text{tBu}$ ), 1.15 (d,  $J = 6.4$  Hz, 12H,  $\text{CH}_3$ ). HRMS (ESI): m/z calcd for  $\text{C}_{17}\text{H}_{29}\text{N}_3\text{H}^+$ : 276.2440, found: 276.2449.

***N,N'*-diisopropyl-*N'*-2,6-dimethylphenylguanidine (13l):**  $^1\text{H}$  NMR (400 MHz,  $\text{CDCl}_3$ ):  $\delta$  7.09-6.70 (3 H, ArH), 3.31-3.09 (m, 2 H, CH), 2.11 (s, Ar $\text{CH}_3$ , 6 H), 1.15 (s,  $\text{CH}_3$ , 12 H). HRMS (ESI): m/z calcd for  $\text{C}_{15}\text{H}_{25}\text{N}_3\text{H}^+$ : 248.2127, found: 248.2127.

**1,3-Diisopropyl-2-(4-nitrophenyl)guanidine (13m):**  $^1\text{H}$  NMR (400 MHz,  $\text{CDCl}_3$ ):  $\delta$

8.09-6.86(m, 4H, ArH), 3.77 (s, 4H, CH, NH), 1.18 (s, 12H,  $\text{CH}_3$ ). HRMS (ESI): m/z calcd for  $\text{C}_{13}\text{H}_{20}\text{N}_4\text{O}_2\text{H}^+$ : 265.1665, found: 265.1674.

**1,3-Diisopropyl-2-(4-(trifluoromethyl)phenyl)guanidine (13n):**  $^1\text{H}$  NMR (400 MHz,

$\text{CDCl}_3$ ):  $\delta$  7.49-6.91(m, 4H, ArH), 3.81-3.73(m, 2H, CH), 3.60-3.59(m, 2H, NH), 1.18 (d,  $J = 6.4$  Hz, 12H,  $\text{CH}_3$ ). HRMS (ESI): m/z calcd for  $\text{C}_{14}\text{H}_{20}\text{F}_3\text{N}_3\text{H}^+$ : 288.1688, found: 288.1696.

**(Z)-N,N'-Diisopropylmorpholine-4-carboximidamide (13o):**  $^1\text{H}$  NMR (400 MHz,

$\text{CDCl}_3$ ):  $\delta$  3.87-3.61 (m, 4H,  $\text{CH}_2$ ), 3.57-3.42 (m, 2H, CH), 3.12-3.10 (m, 4H,  $\text{CH}_2$ ), 1.13 (dd,  $J = 14.8, 6.3$  Hz, 12H,  $\text{CH}_3$ ). HRMS (ESI): m/z calcd for  $\text{C}_{11}\text{H}_{23}\text{N}_3\text{OH}^+$ : 214.1919, found: 214.1914.

**(Z)-N,N'-Diisopropylpyrrolidine-1-carboximidamide (13p):**  $^1\text{H}$  NMR (400 MHz,  $\text{CDCl}_3$ ):

$\delta$  3.32 (dt,  $J = 12.6, 6.3$  Hz, 2H, CH), 3.23-3.13 (m, 4H,  $\text{CH}_2$ ), 1.83-1.63 (m, 4H,  $\text{CH}_2$ ), 1.04 (d,  $J = 6.4$  Hz, 12H,  $\text{CH}_3$ ). HRMS (ESI): m/z calcd for  $\text{C}_{11}\text{H}_{23}\text{N}_3\text{H}^+$ : 198.1970, found: 198.1979.

**(Z)-N,N'-Diisopropylindoline-1-carboximidamide (13q):**  $^1\text{H}$  NMR (400 MHz,  $\text{CDCl}_3$ ):

$\delta$  7.19-6.73 (m, 4H, ArH), 3.88-3.78 (m, 4H,  $\text{CH}_2$ ), 3.45-3.44 (m, 2H, CH), 2.99-2.95 (m, 2H,  $\text{CH}_2$ ), 1.15-1.13 (m, 12H,  $\text{CH}_3$ ). HRMS (ESI): m/z calcd for  $\text{C}_{11}\text{H}_{23}\text{N}_3\text{H}^+$ : 198.1970, found: 198.1979.

**(Z)-N,N'-Diisopropyl-6-methylindoline-1-carboximidamide (13r):** <sup>1</sup>H NMR (400 MHz, CDCl<sub>3</sub>): δ 7.06-6.88 (m, 3H, ArH), 4.36-2.69 (m, 6H, CH, CH<sub>2</sub>), 2.25 (s, 3H, Ar-CH<sub>3</sub>), 1.13 (s, 12H, CH<sub>3</sub>). HRMS (ESI): m/z calcd for C<sub>16</sub>H<sub>25</sub>N<sub>3</sub>H<sup>+</sup>: 260.2127, found: 260.2134.

**(1Z,4Z)-N1,N'1,N4,N'4-tetraisopropylpiperazine-1,4-bis(carboximidamide) (13s):** <sup>1</sup>H NMR (400 MHz, CDCl<sub>3</sub>): δ 3.51-3.34 (m, 2H, CH), 3.31-3.17 (m, 1H, CH), 3.01 (s, 8H, CH<sub>2</sub>), 1.03 (d, *J* = 5.5 Hz, 24H, CH<sub>3</sub>). <sup>13</sup>C NMR (100 MHz, CDCl<sub>3</sub>): δ 155.21, 47.78, 46.57, 45.63, 24.34, 23.17. HRMS (ESI): m/z calcd for C<sub>18</sub>H<sub>38</sub>N<sub>6</sub>H<sup>+</sup>: 339.3236, found: 339.3278.

The  $^1\text{H}$  NMR of  $\text{H}_2\text{L}^1$ :

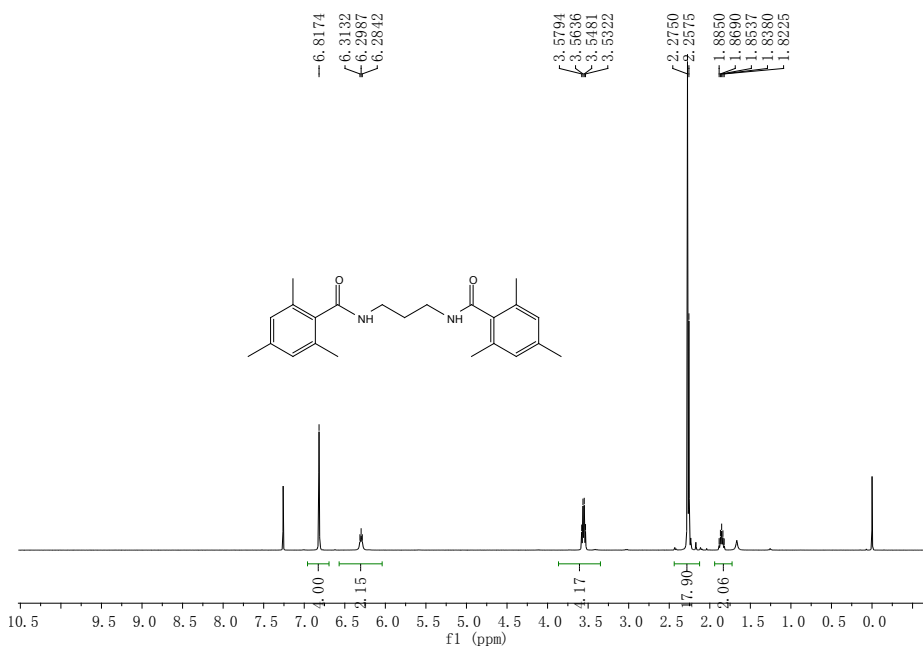

The  $^{13}\text{C}$  NMR of  $\text{H}_2\text{L}^1$ :

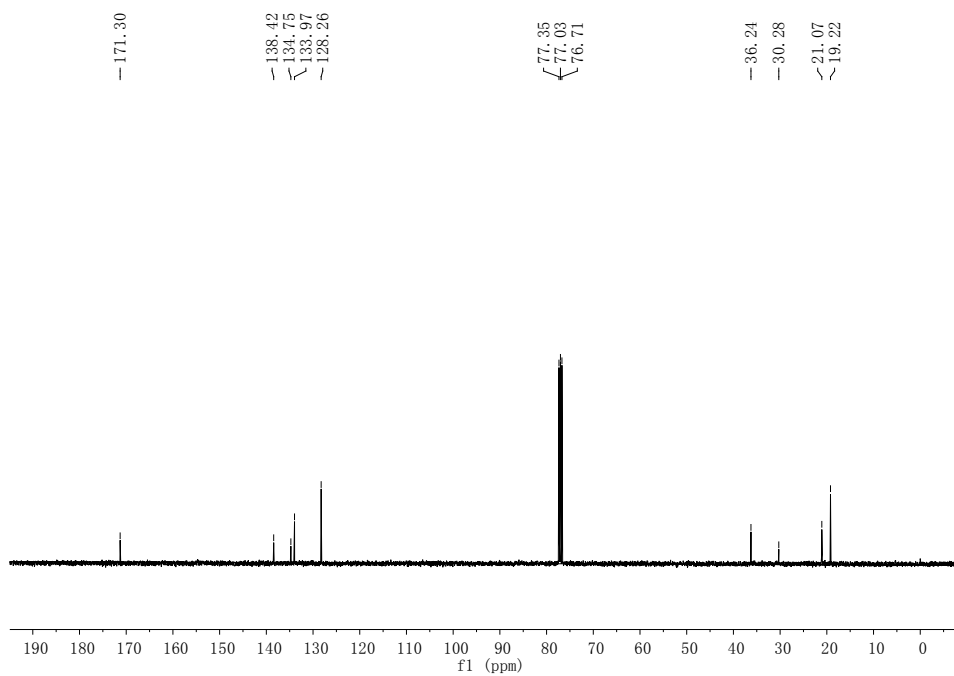

The  $^1\text{H}$  NMR of  $\text{H}_2\text{L}^2$ :

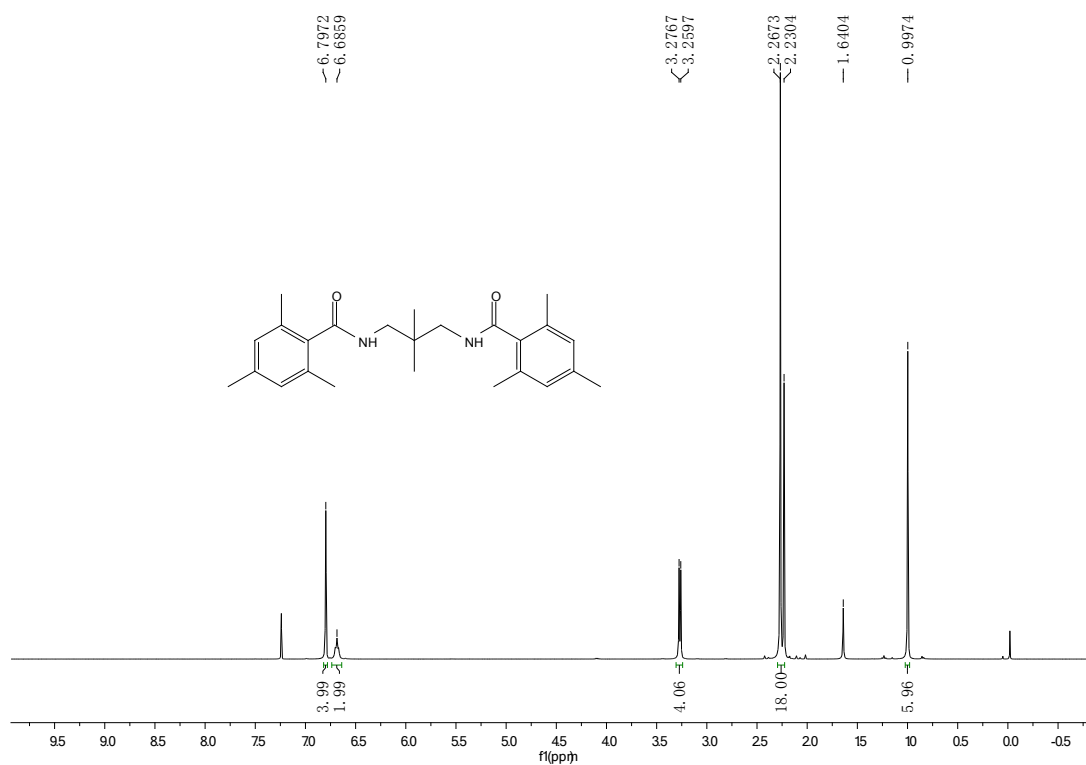

The  $^{13}\text{C}$  NMR of  $\text{H}_2\text{L}^2$ :

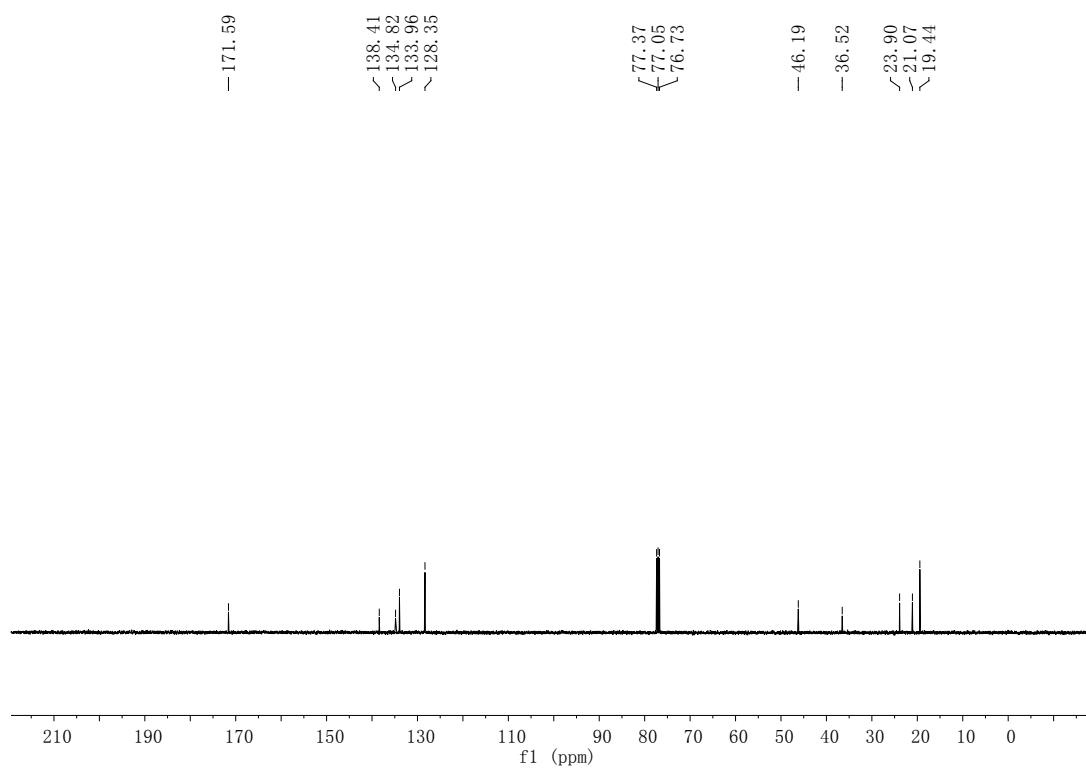

The  $^1\text{H}$  NMR of  $\text{H}_2\text{L}^3$ :

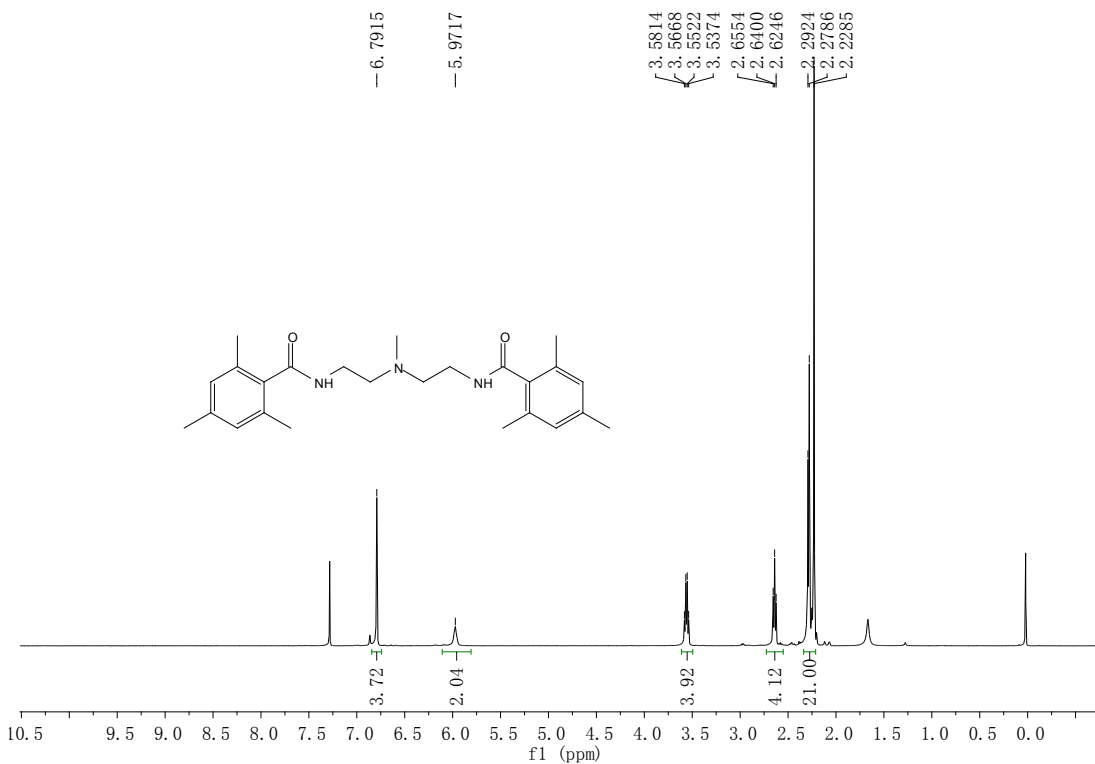

The  $^{13}\text{C}$  NMR of  $\text{H}_2\text{L}^3$ :

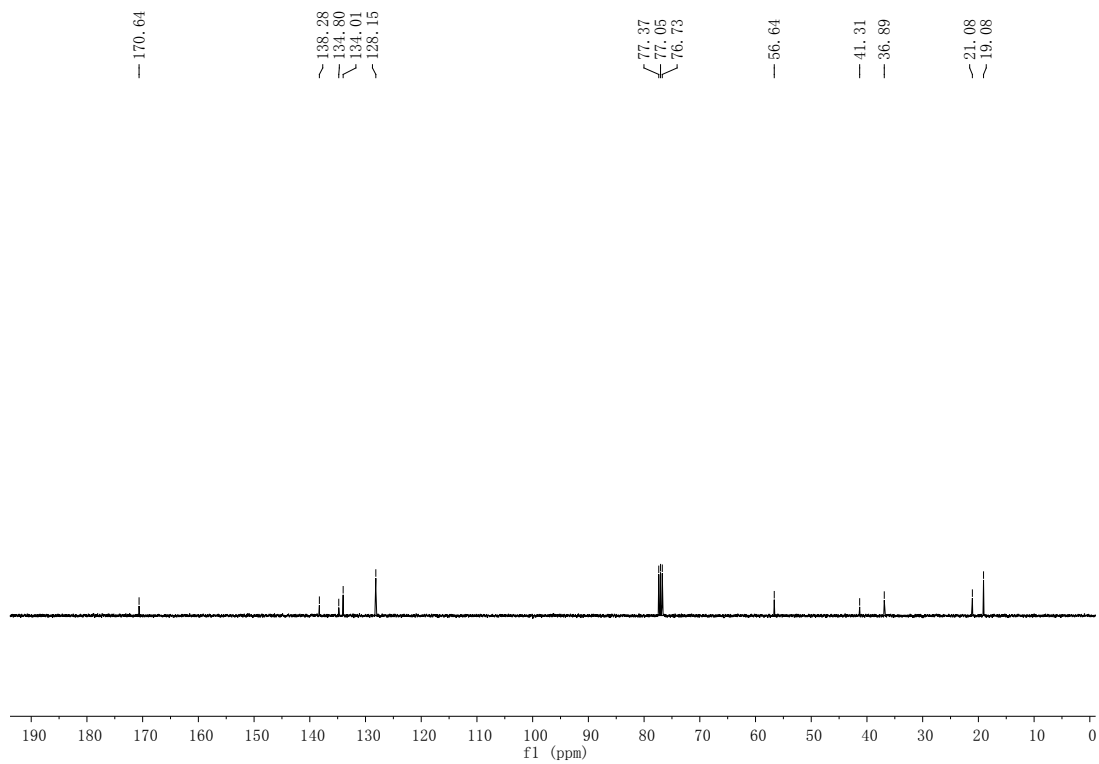



The  $^1\text{H}$  NMR of complex **1**:

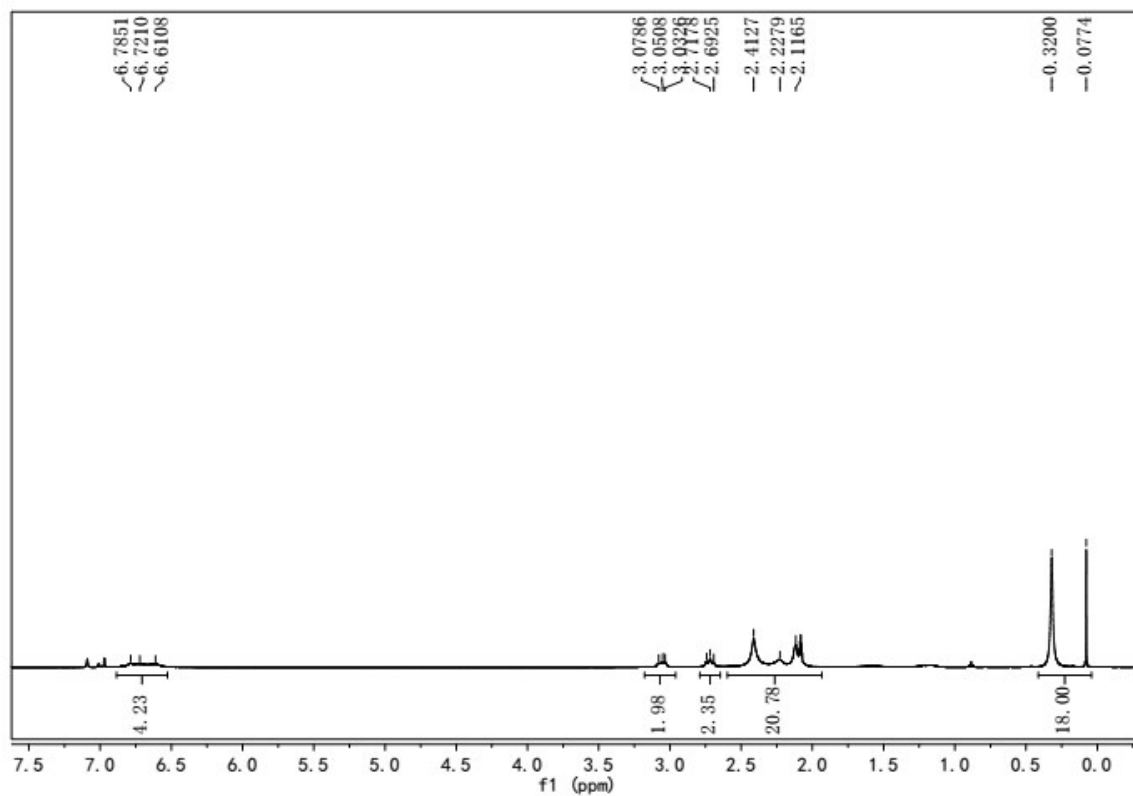

The  $^{13}\text{C}$  NMR of complex **1**:

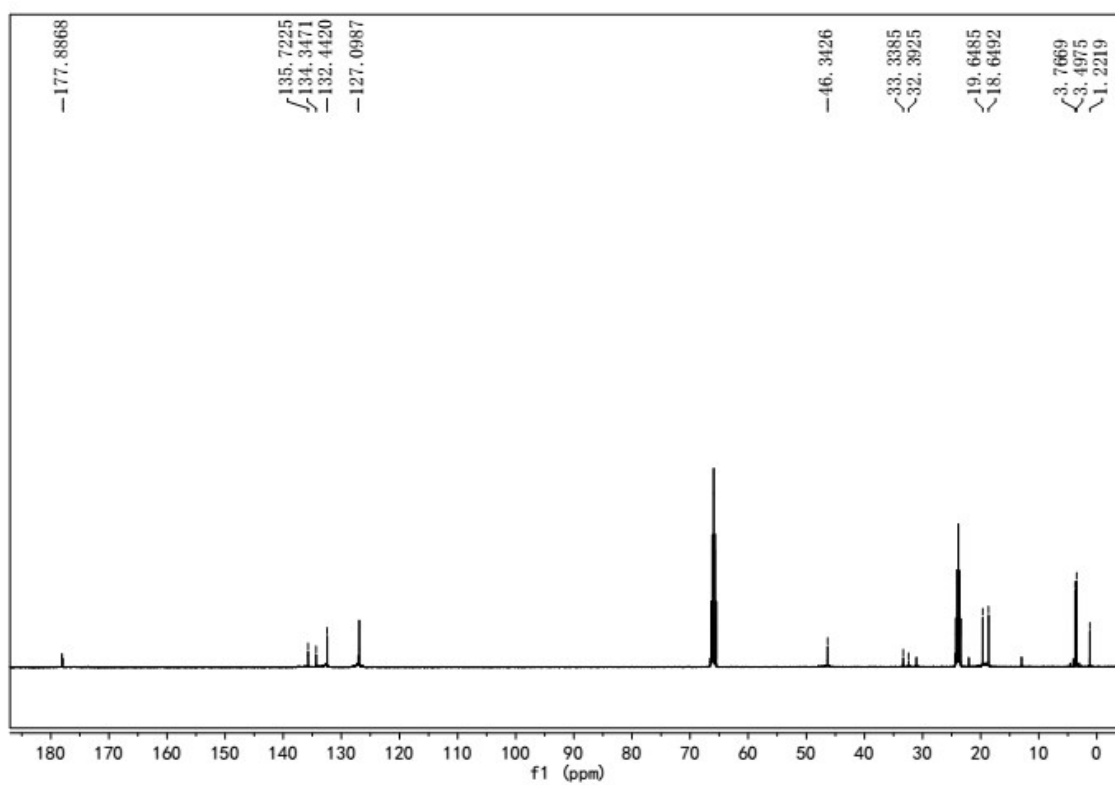

The  $^1\text{H}$  NMR of complex **4**:

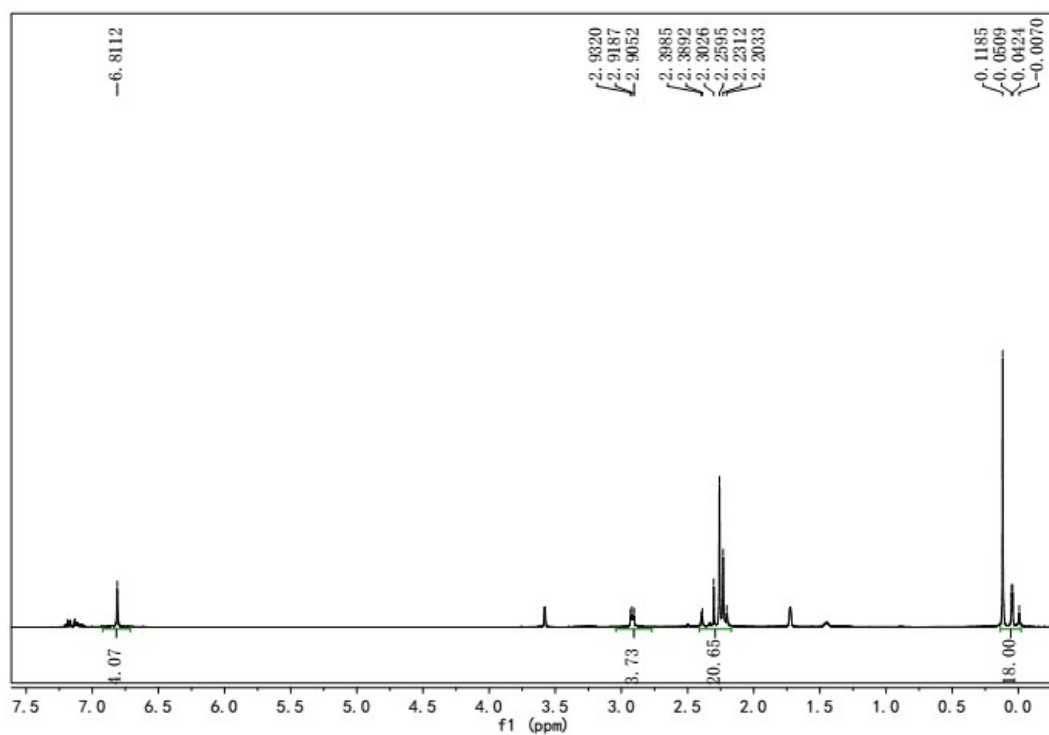

The  $^1\text{H}$  NMR of complex **5**:

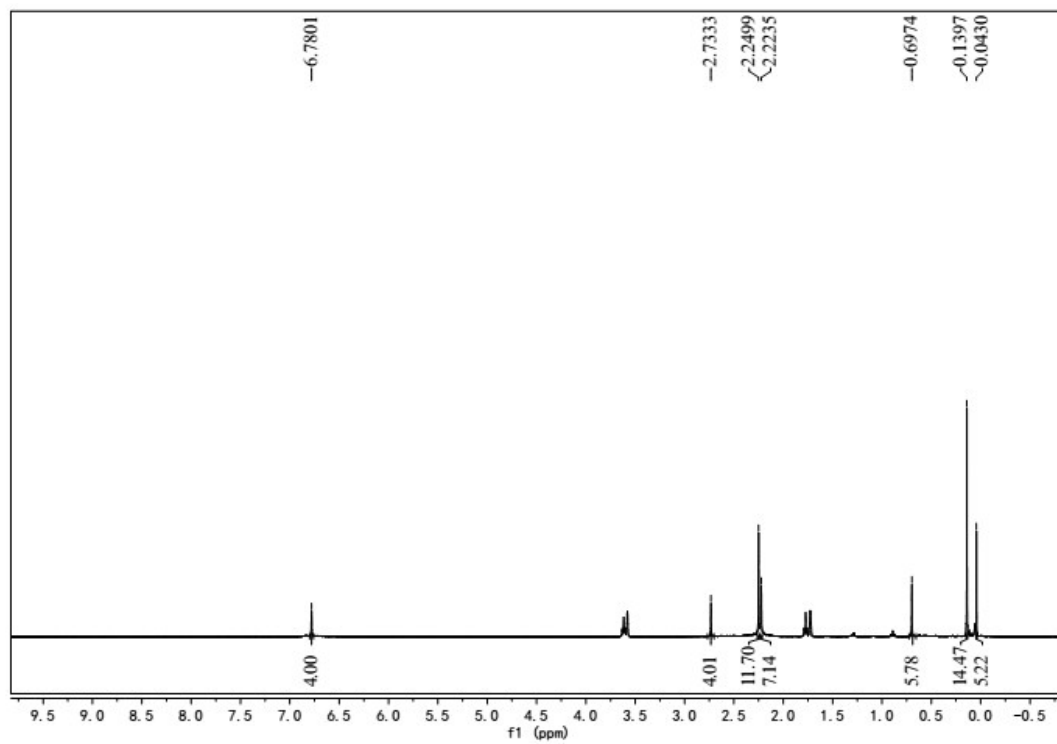

The  $^{13}\text{C}$  NMR of complex **5**:

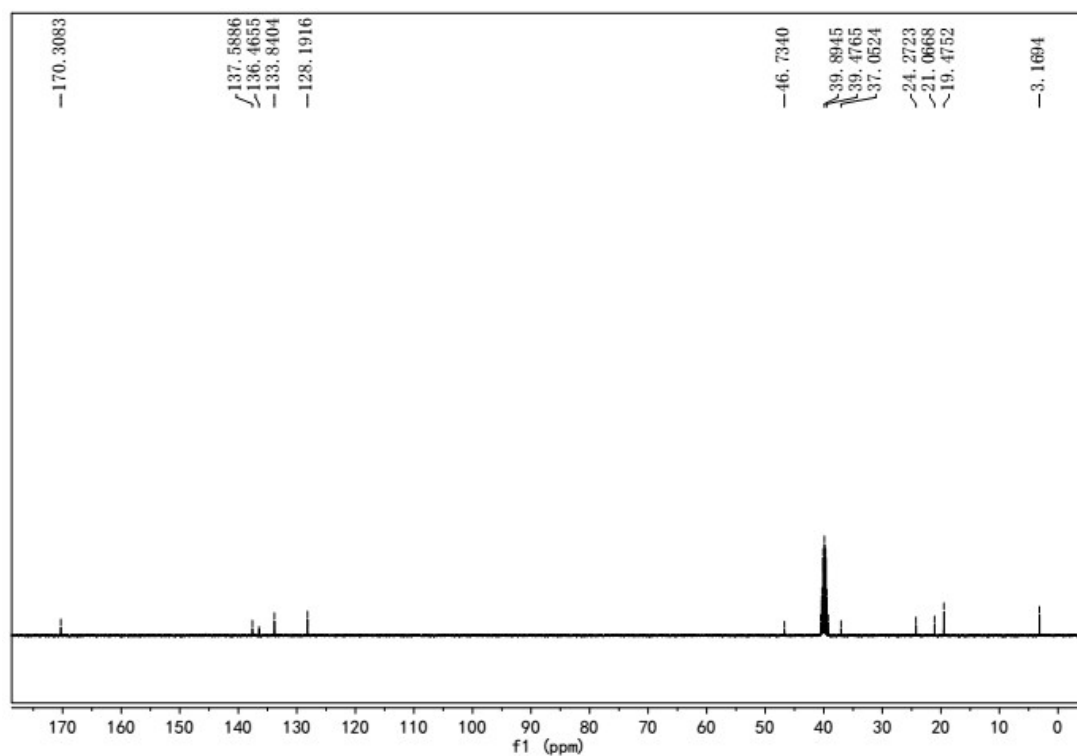

The  $^1\text{H}$  NMR of complex **7**:

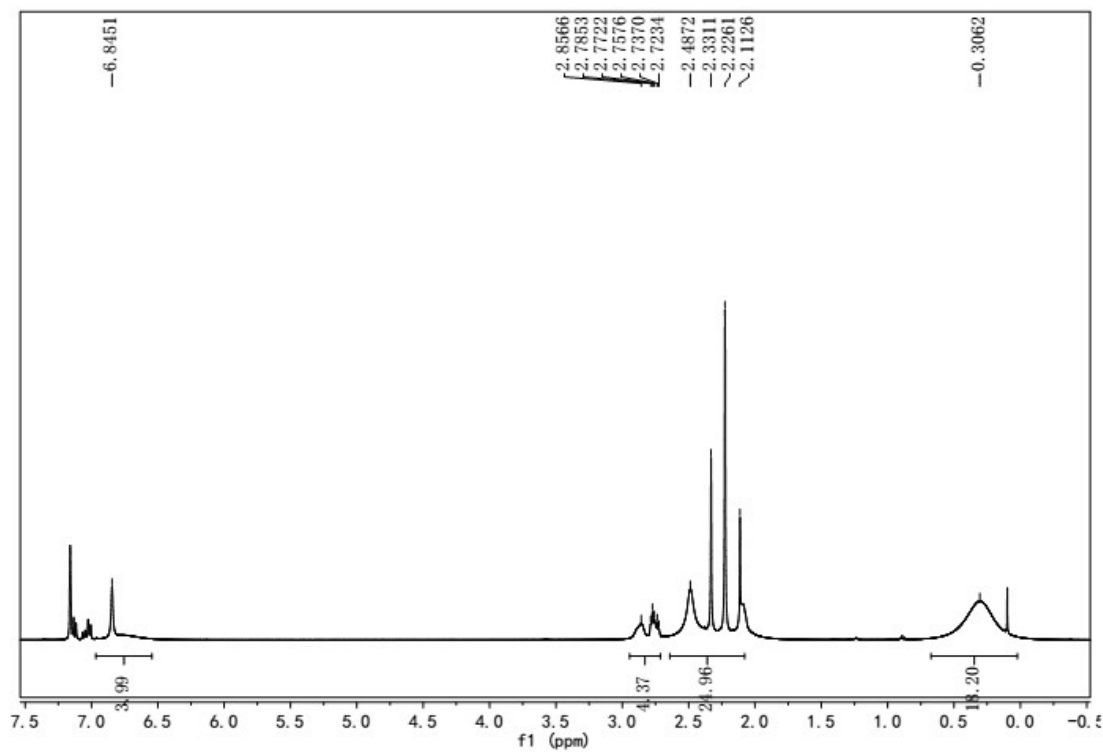

### N-Benzyl-N-methylbenzamide (11a): $^1\text{H}$ NMR

7.4968  
7.4914  
7.4812  
7.4727  
7.4237  
7.3847  
7.3357  
7.3199  
7.2999  
7.2031  
7.1885

— 4.7896  
— 4.5392

— 3.0567  
— 2.8872

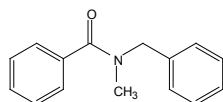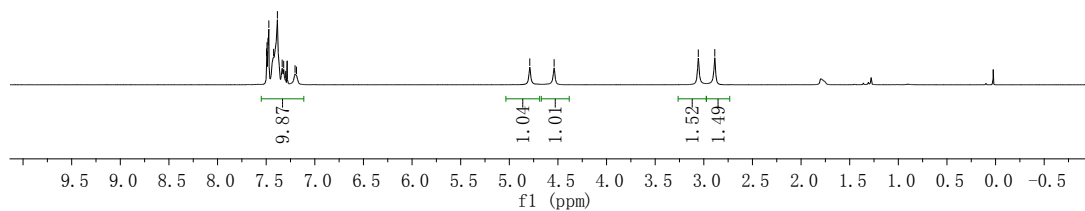

### N-benzyl-4-methoxy-N-methylbenzamide (11b):

7.4316  
7.4101  
7.3359  
7.3186  
7.2828  
7.2652  
7.2398  
6.8745  
6.8564

— 4.6709  
— 4.5717

— 3.7848

— 2.9343

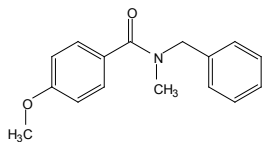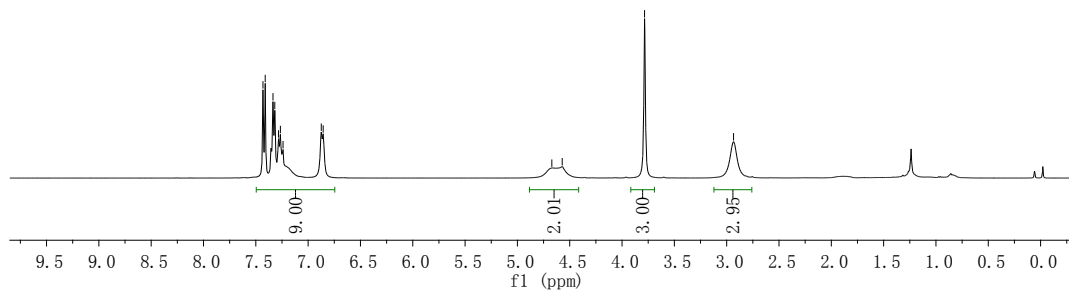

### N-Benzyl-N-methyl-4-fluorobenzamide (11c):

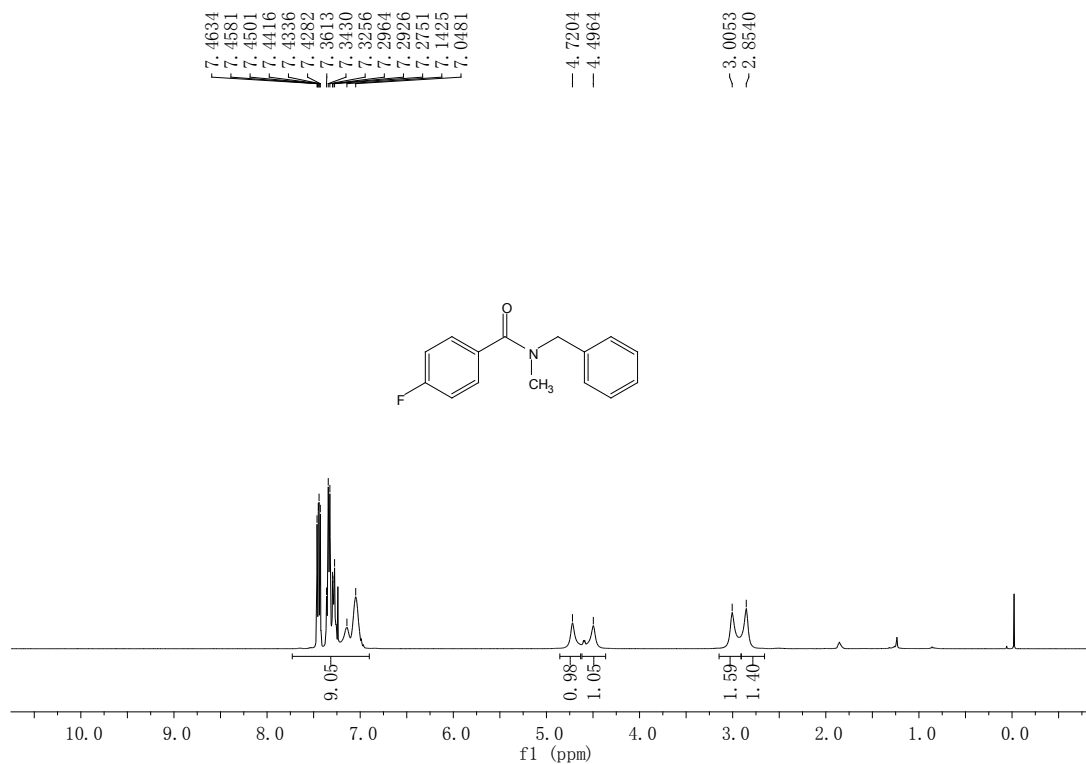

### N-benzyl-N,4-dimethylbenzamide (11d):

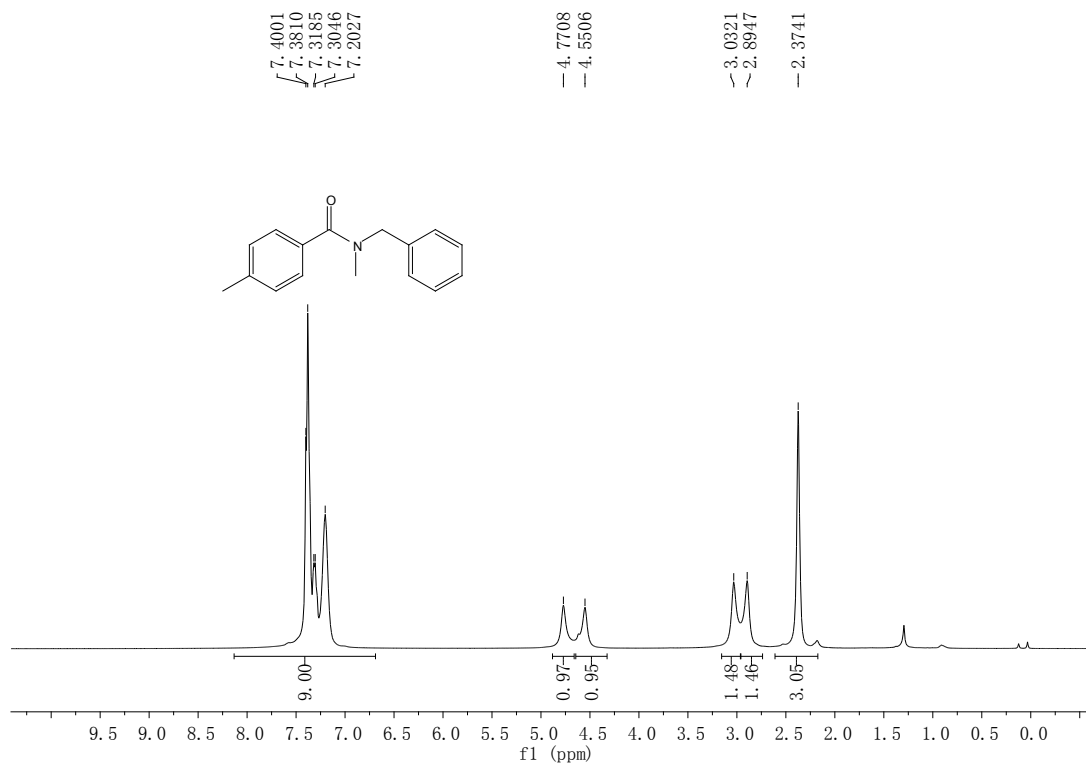

### Morpholino(phenyl)methanone (11e):

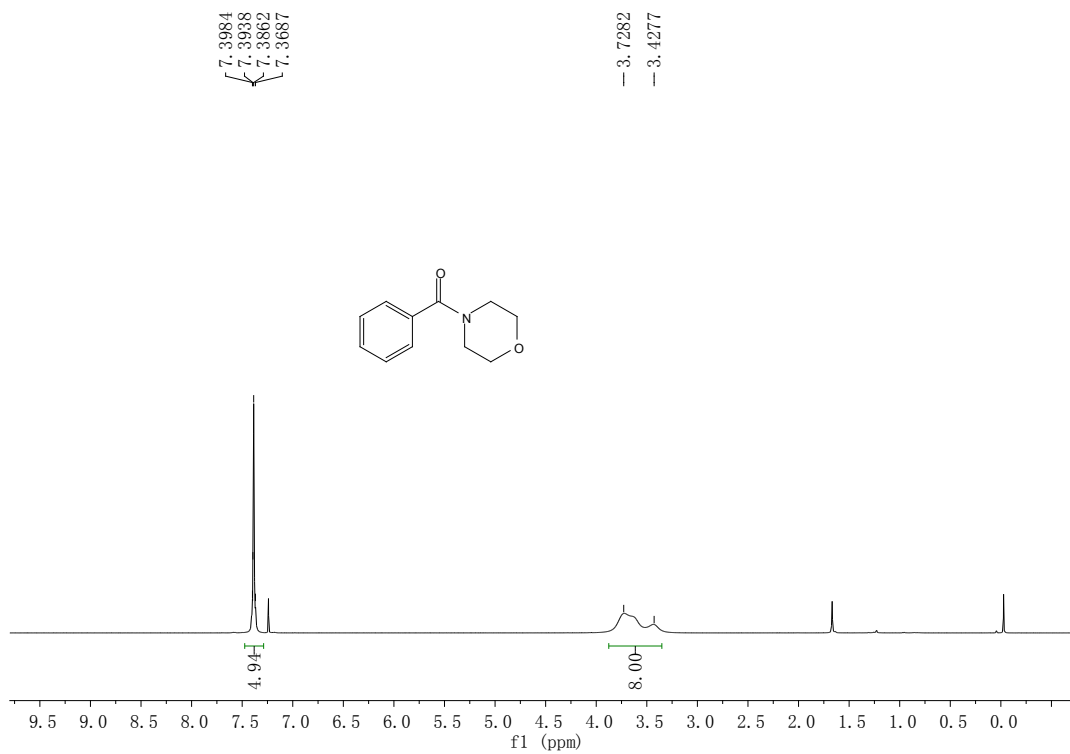

### Morpholino(p-tolyl)methanone (11f):

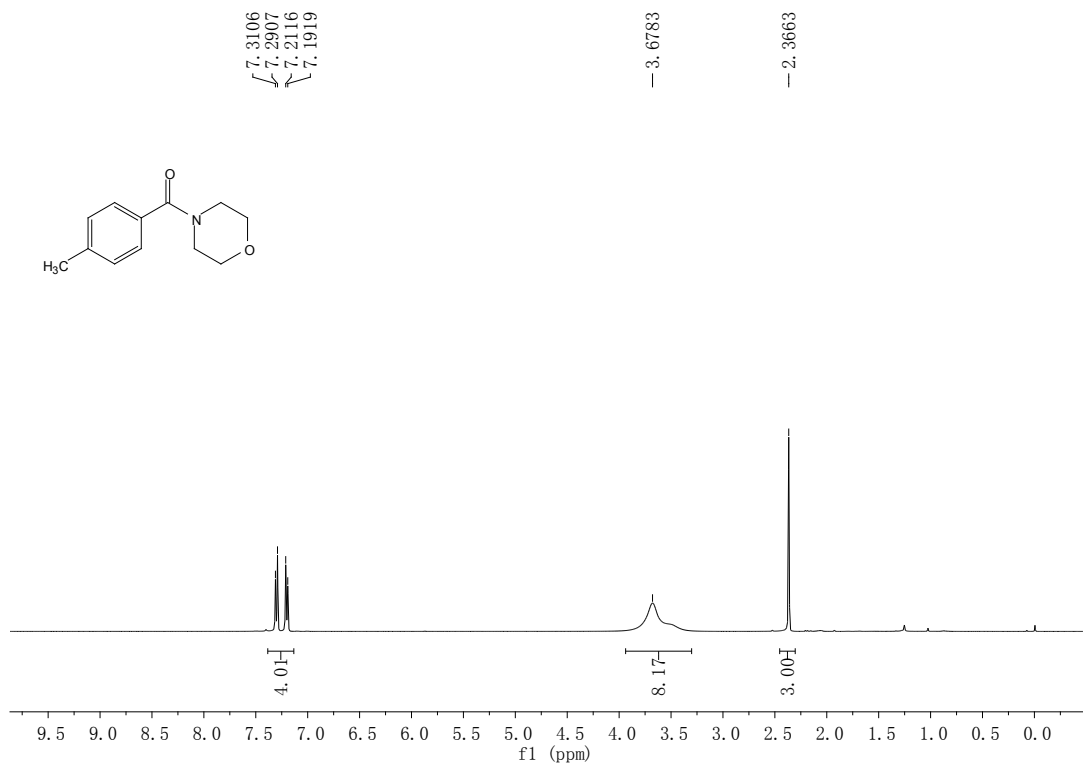

**(4-Fluorophenyl)(morpholino)methanone (11g):**

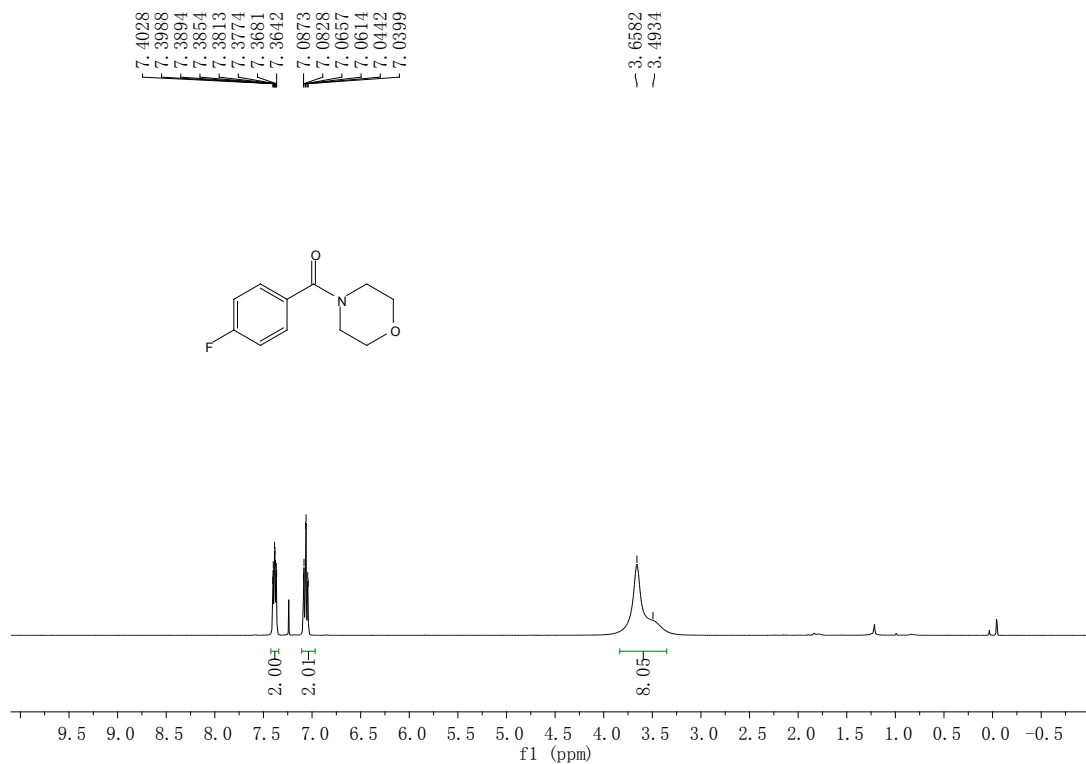

**(4-chlorophenyl)(morpholino)methanone (11h):**

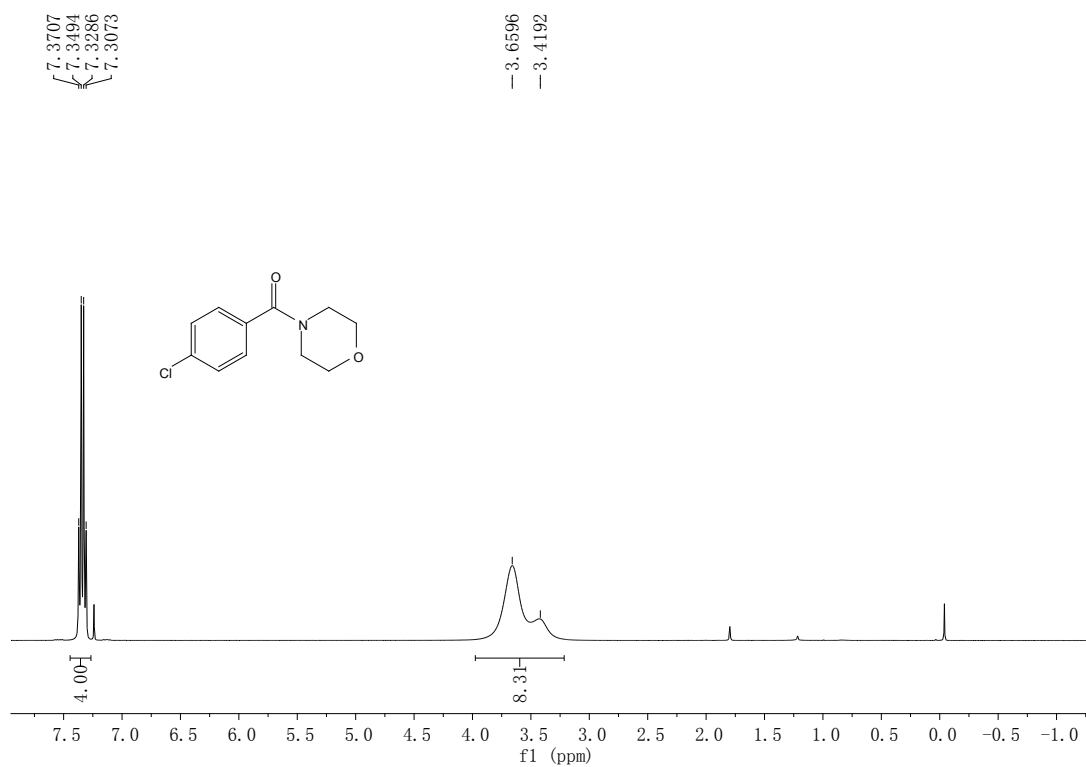

**(3-Chlorophenyl)(morpholino)methanone (11i):**

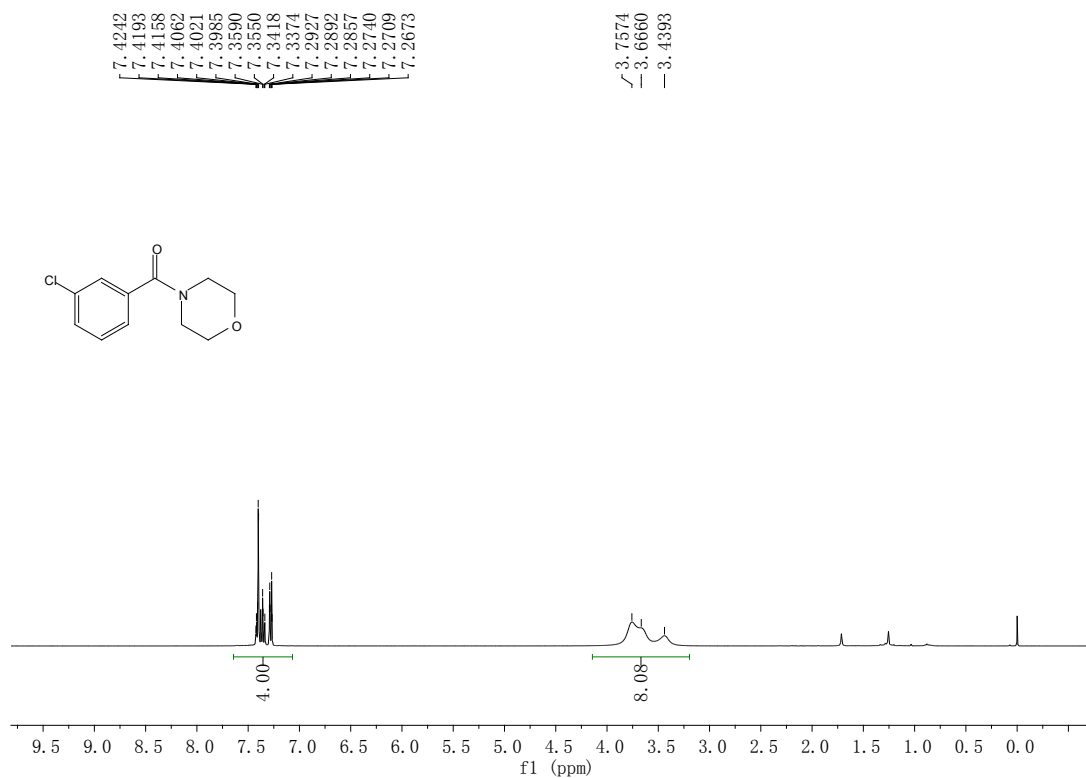

**(2-Chlorophenyl)(morpholino)methanone (11j):**

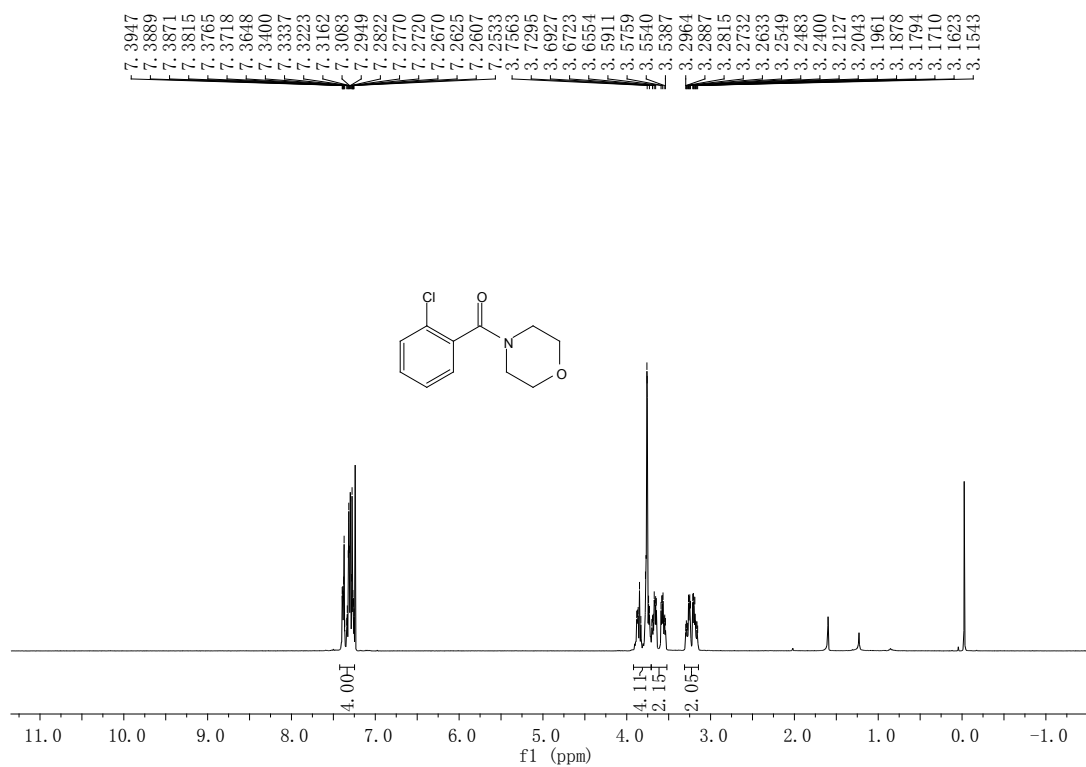



### Morpholino(4-nitrophenyl)methanone (11k):

8.2821  
8.2769  
8.2721  
8.2598  
8.2550  
8.2499  
7.5764  
7.5711  
7.5663  
7.5540  
7.5492  
7.5440  
3.7783  
3.6142  
3.3660

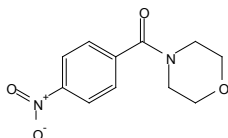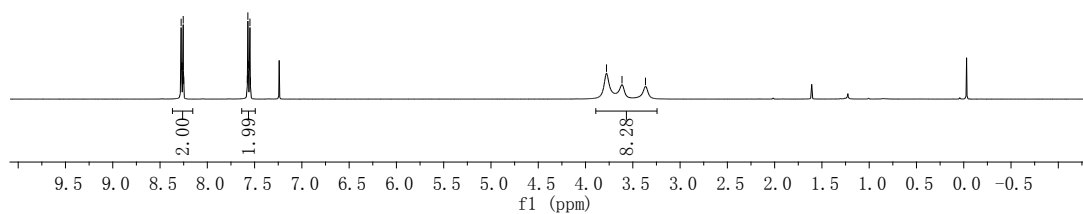

### N-Benzoylpyrrolidine (11l):

7.4969  
7.4920  
7.4843  
7.4804  
7.4727  
7.3753  
7.3708  
7.3625  
7.3575  
3.6407  
3.6235  
3.6060  
3.4114  
3.3947  
3.3784  
1.9692  
1.9522  
1.9355  
1.9176  
1.9018  
1.8746  
1.8591  
1.8428  
1.8263  
1.8098

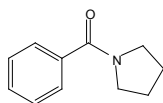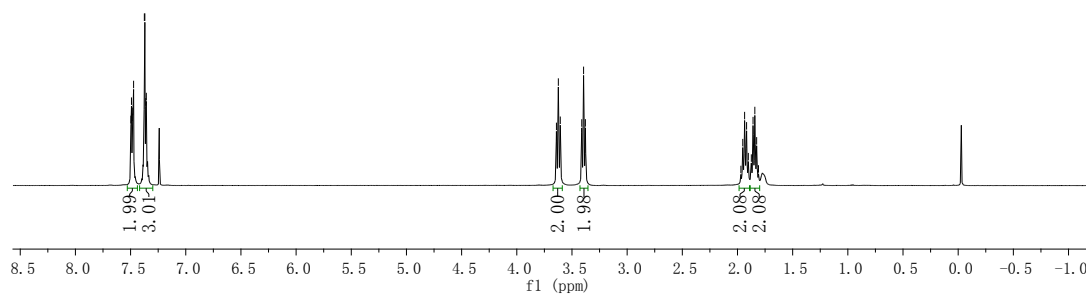

### Phenyl(piperidin-1-yl)methanone (11m):

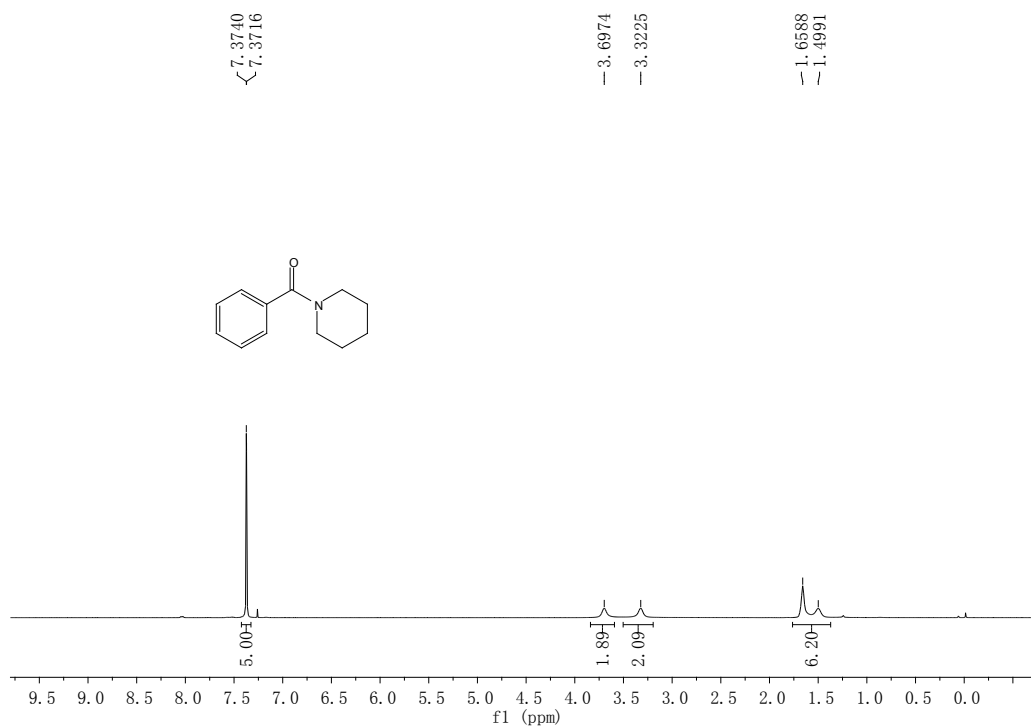

### N-Phenylbenzamide (11n):

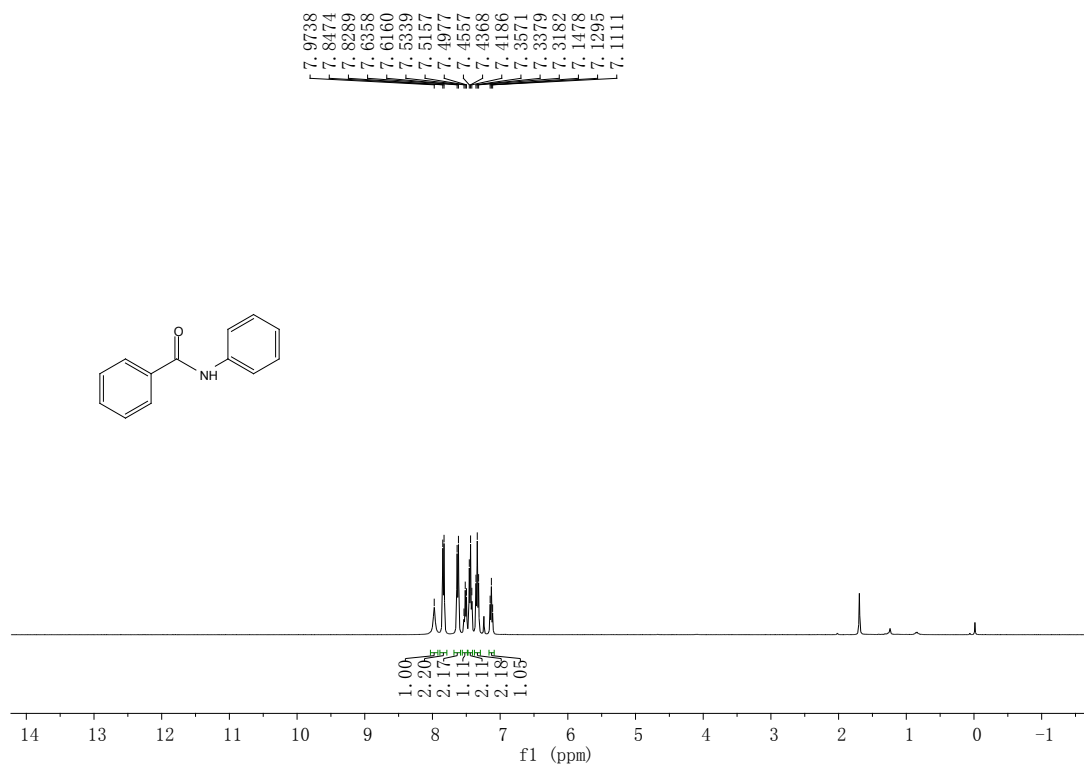

### Indolin-1-yl(phenyl)methanone (11o):

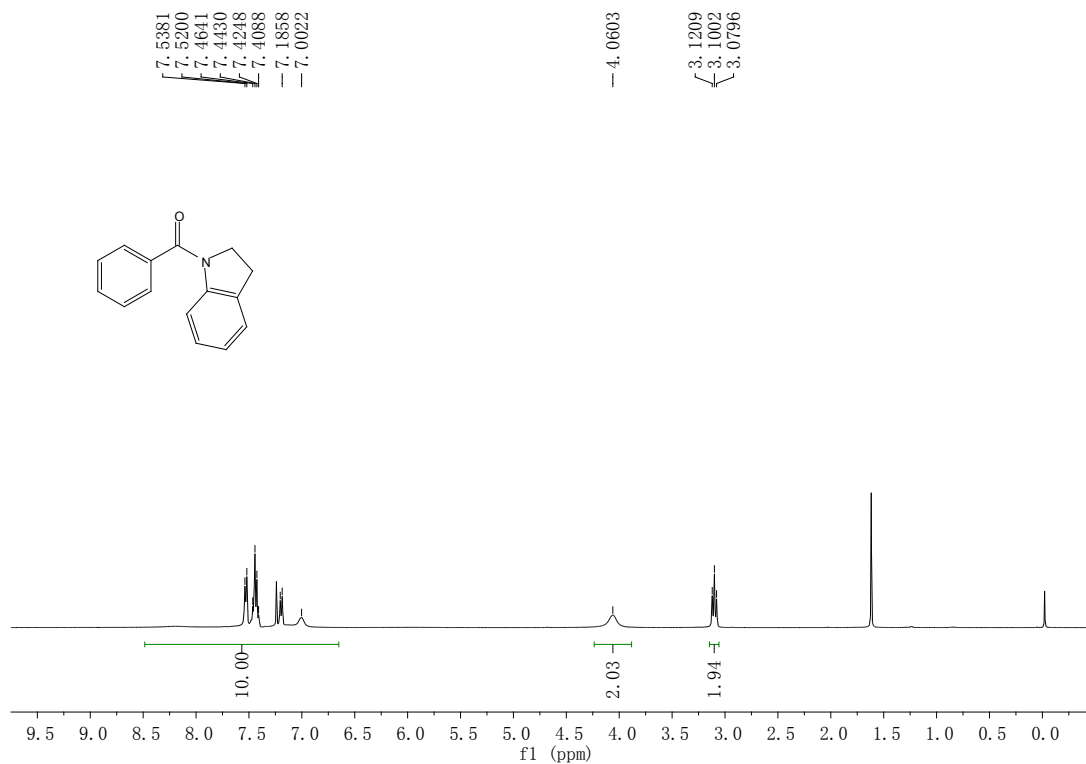

### (2-Methylindolin-1-yl)(phenyl)methanone (11p):

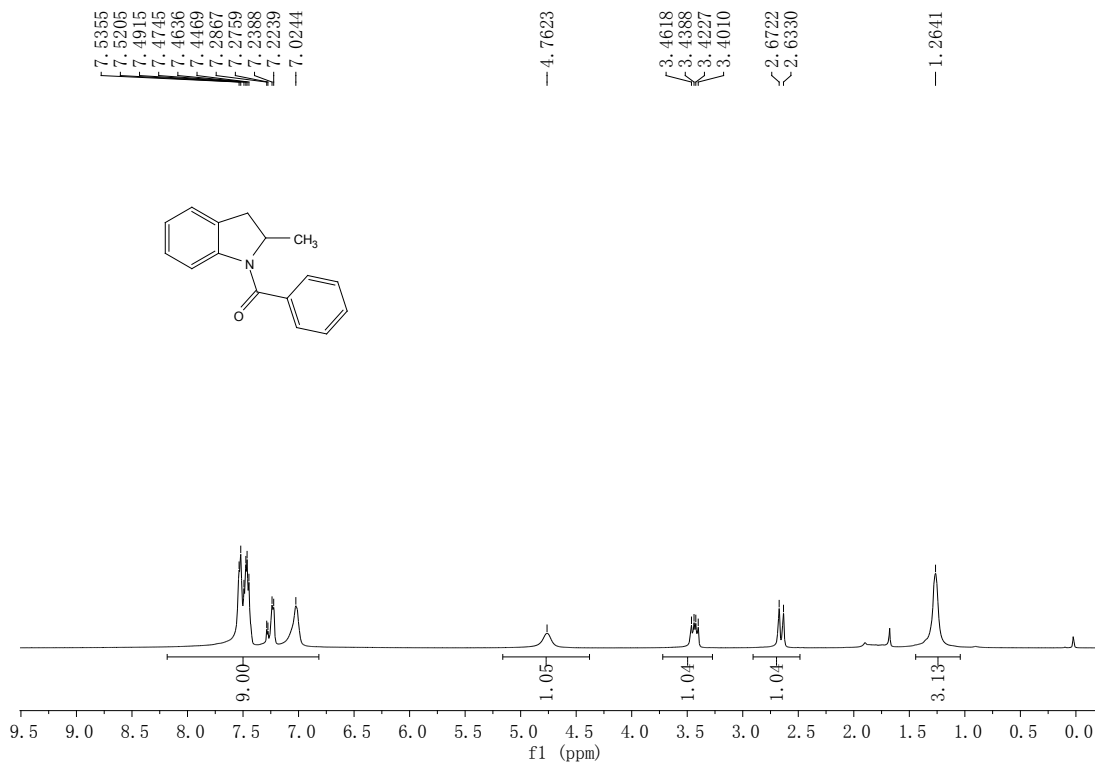

### Indolin-1-yl(m-tolyl)methanone (11q):

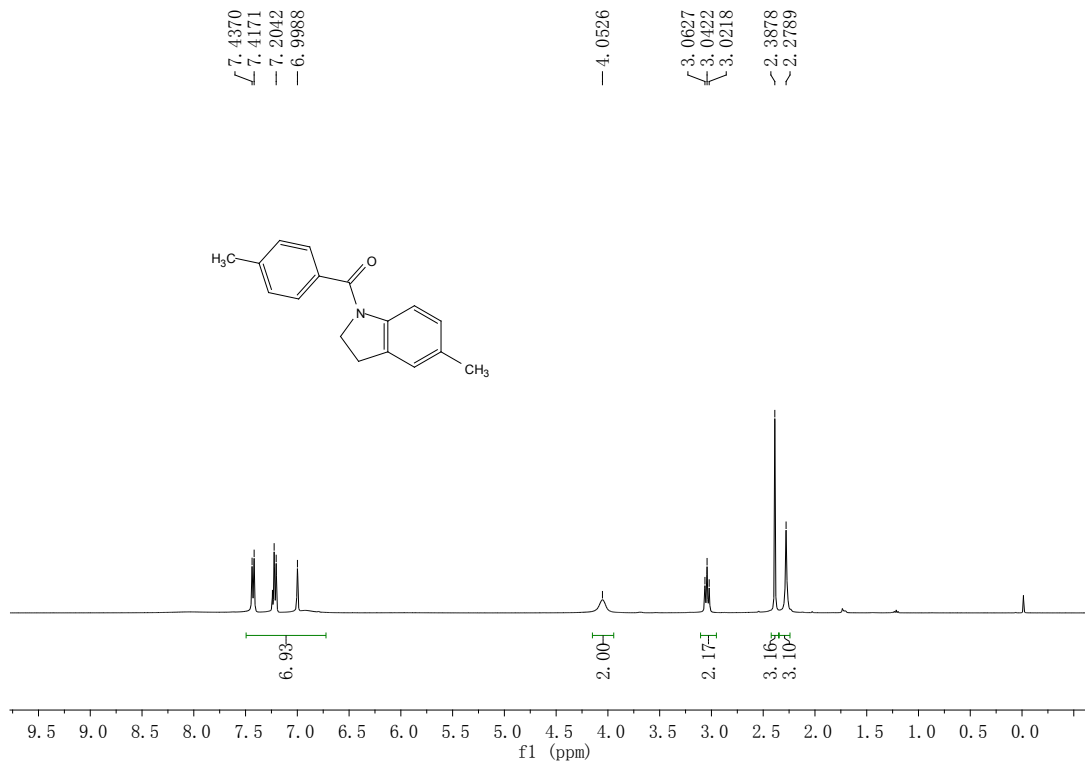

### Piperazine-1,4-diylbis(phenylmethanone) (11r):

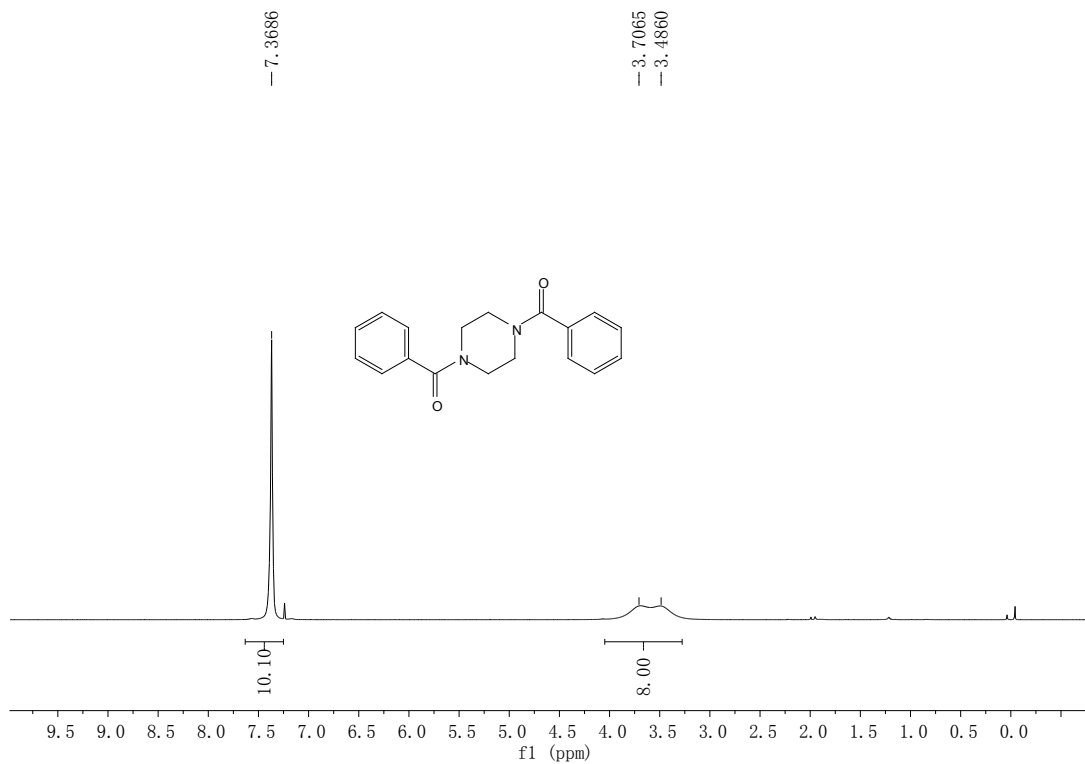

**Piperazine-1,4-diylbis(p-tolylmethanone) (11s):**

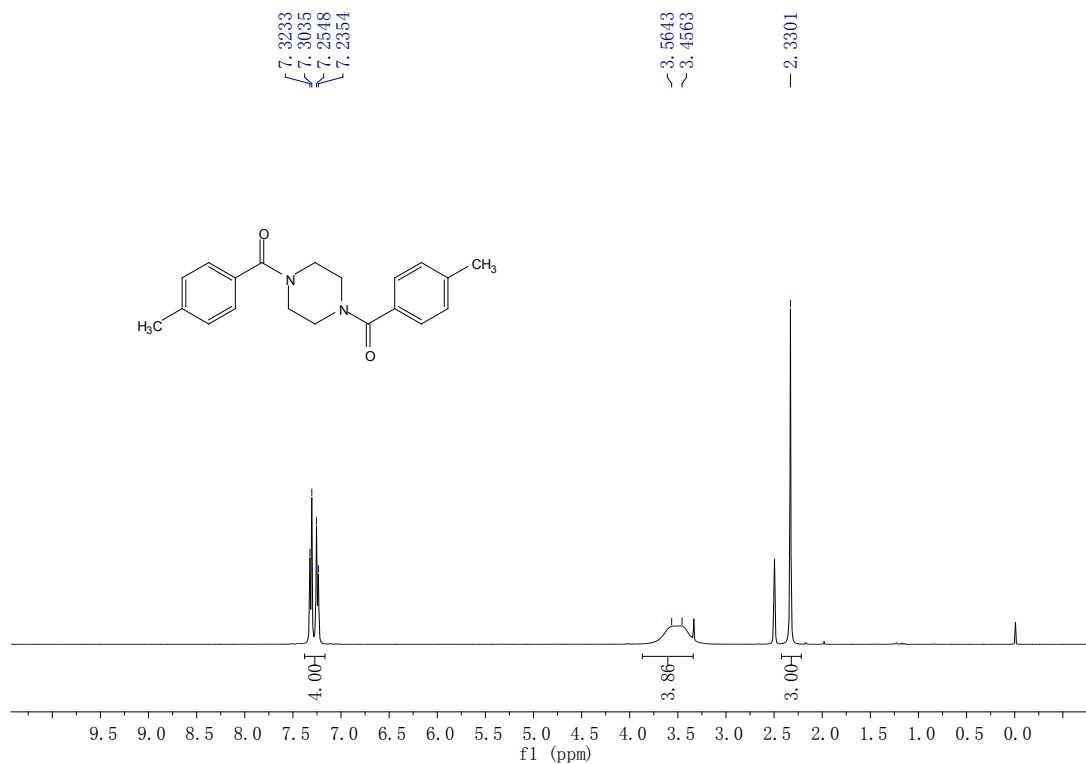

**Piperazine-1,4-diylbis((4-chlorophenyl)methanone) (11t):**

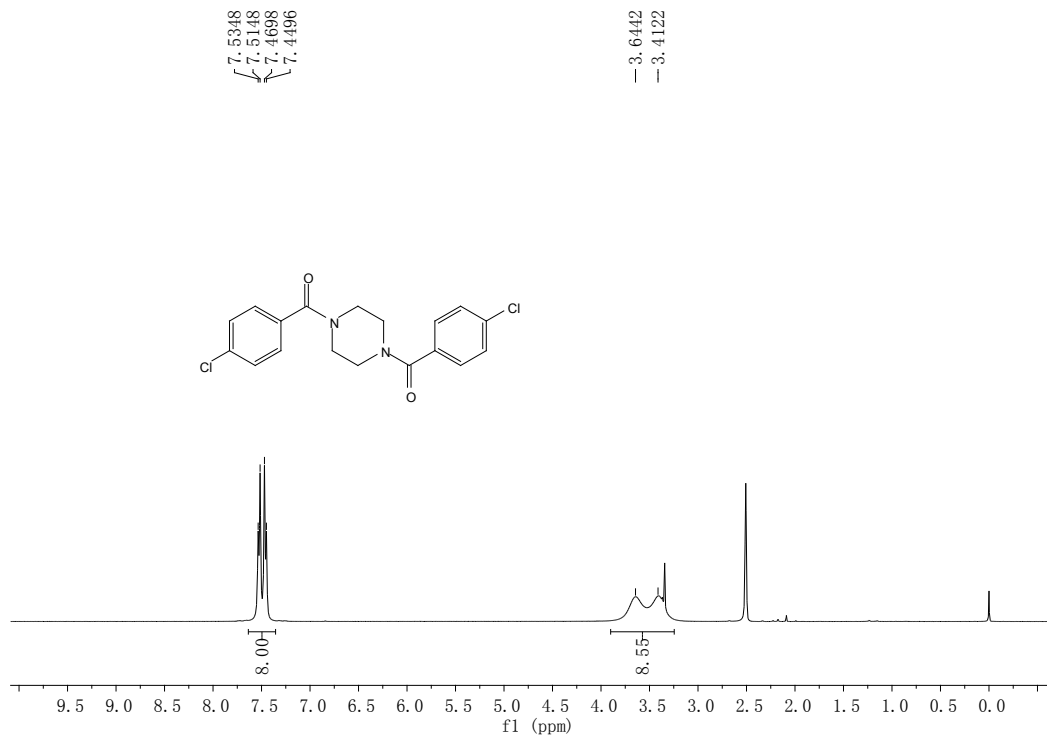

### 1,3-Diisopropyl-2-phenylguanidine (13a):

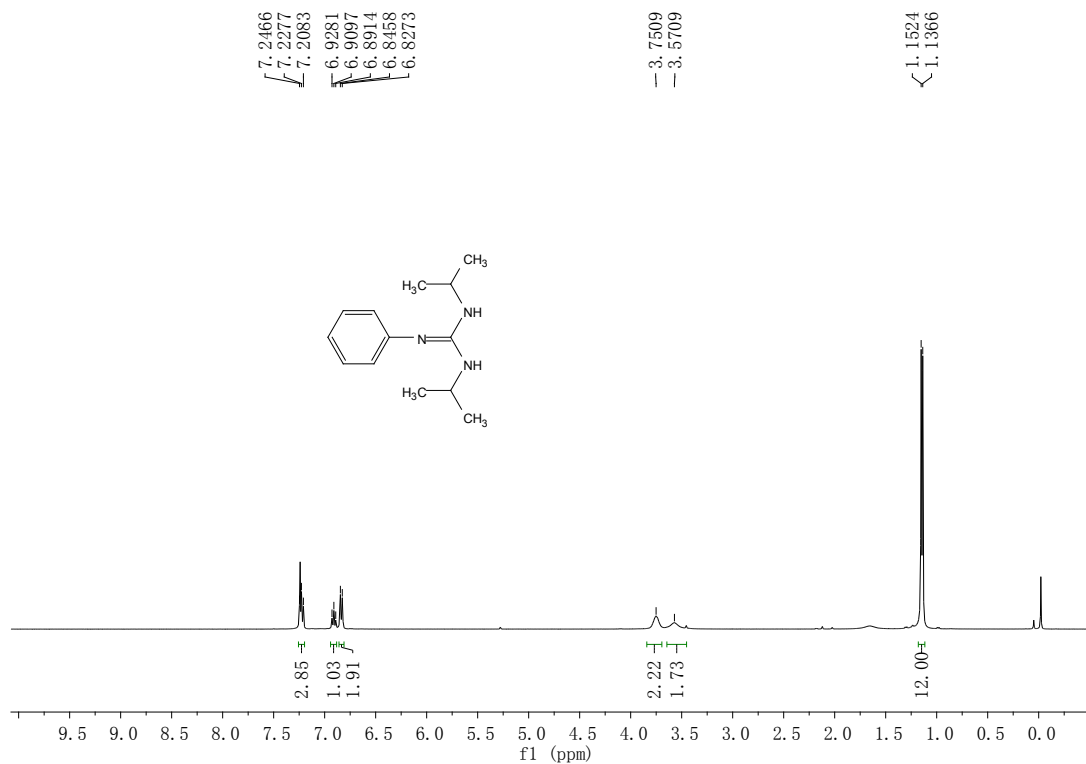

### 2-(4-Fluorophenyl)-1,3-diisopropylguanidine (13b):

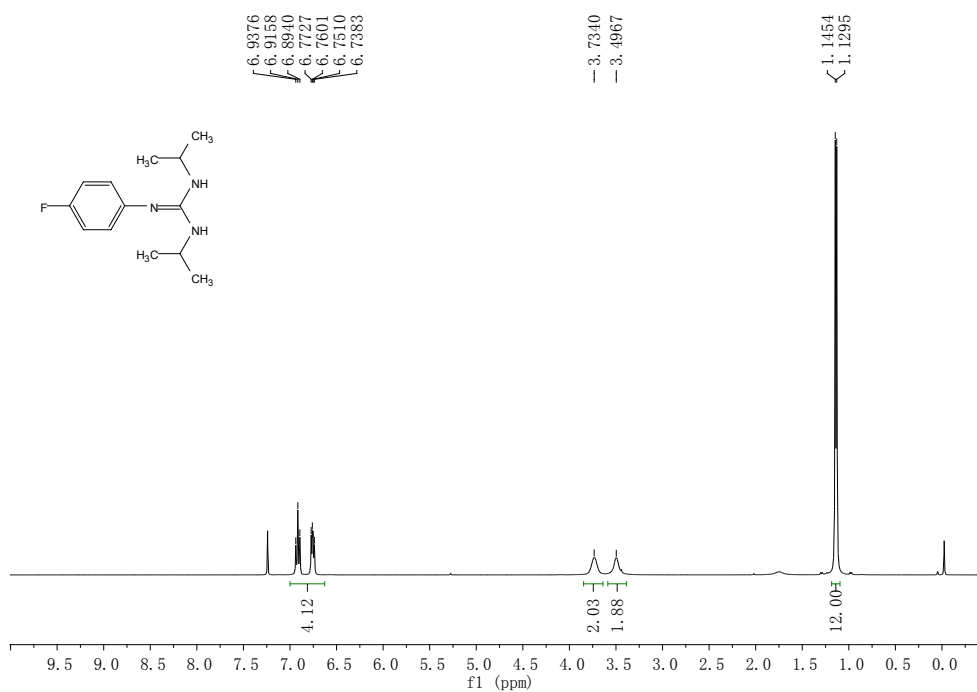

### 2-(4-Chlorophenyl)-1,3-diisopropylguanidine (13c):

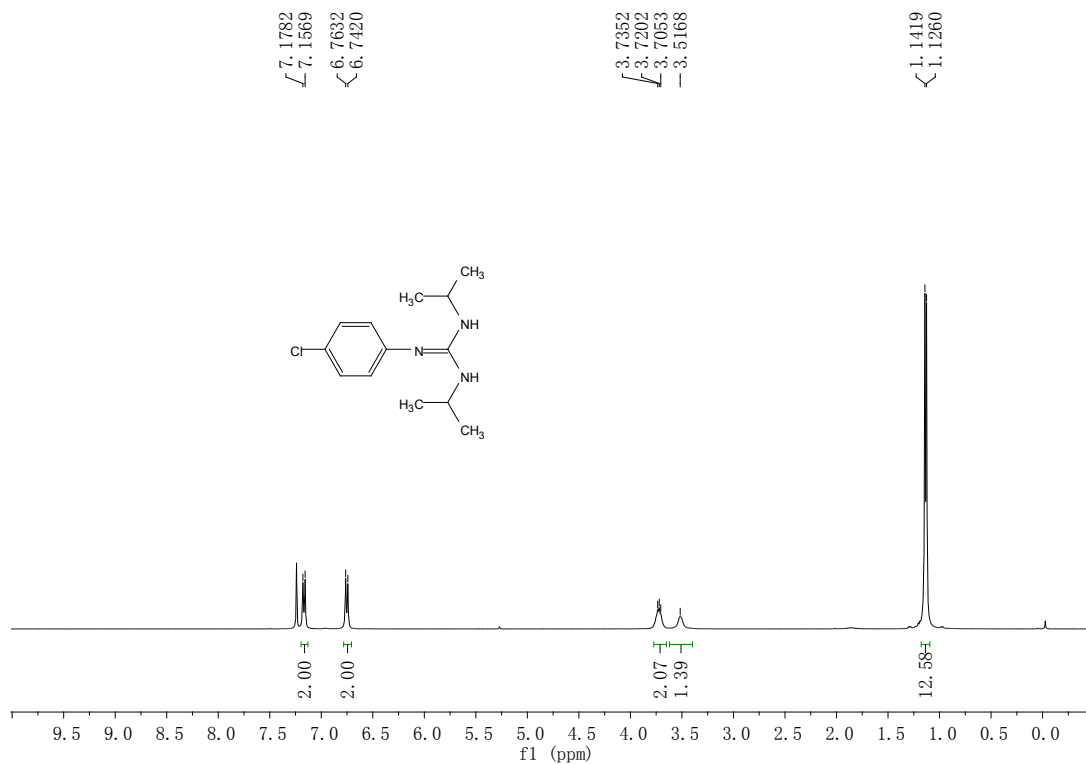

### 2-(4-Bromophenyl)-1,3-diisopropylguanidine (13d):

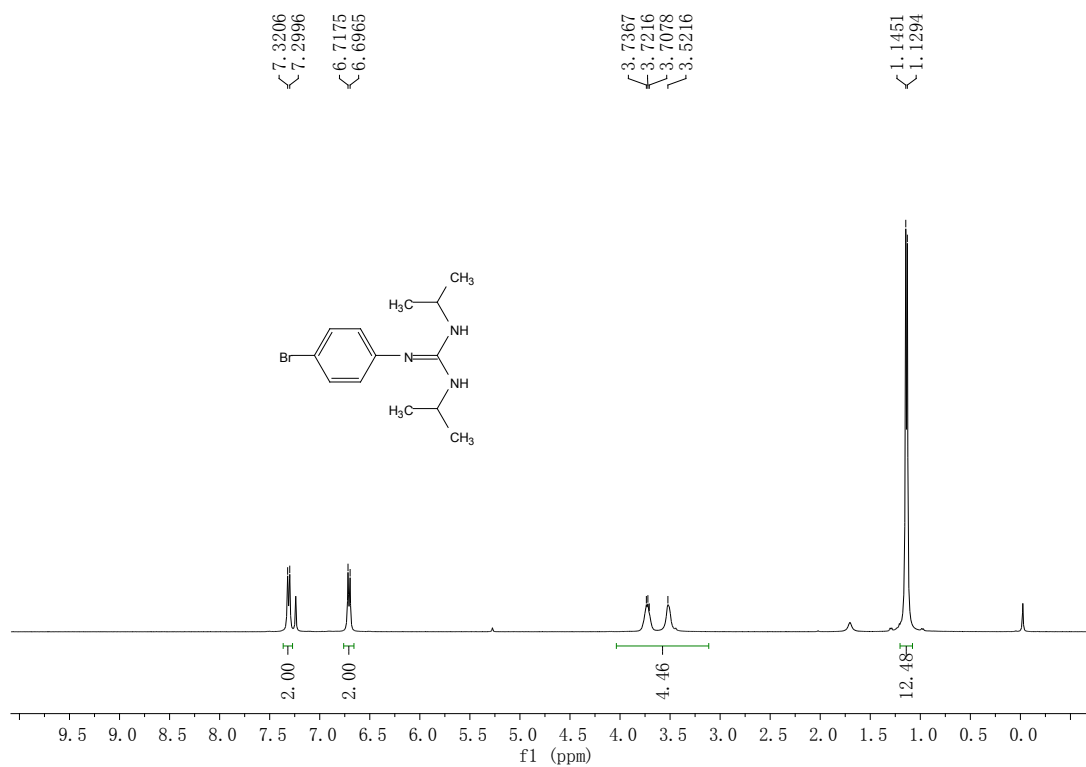

### 1,3-Diisopropyl-2-(4-methoxyphenyl)guanidine (13e):

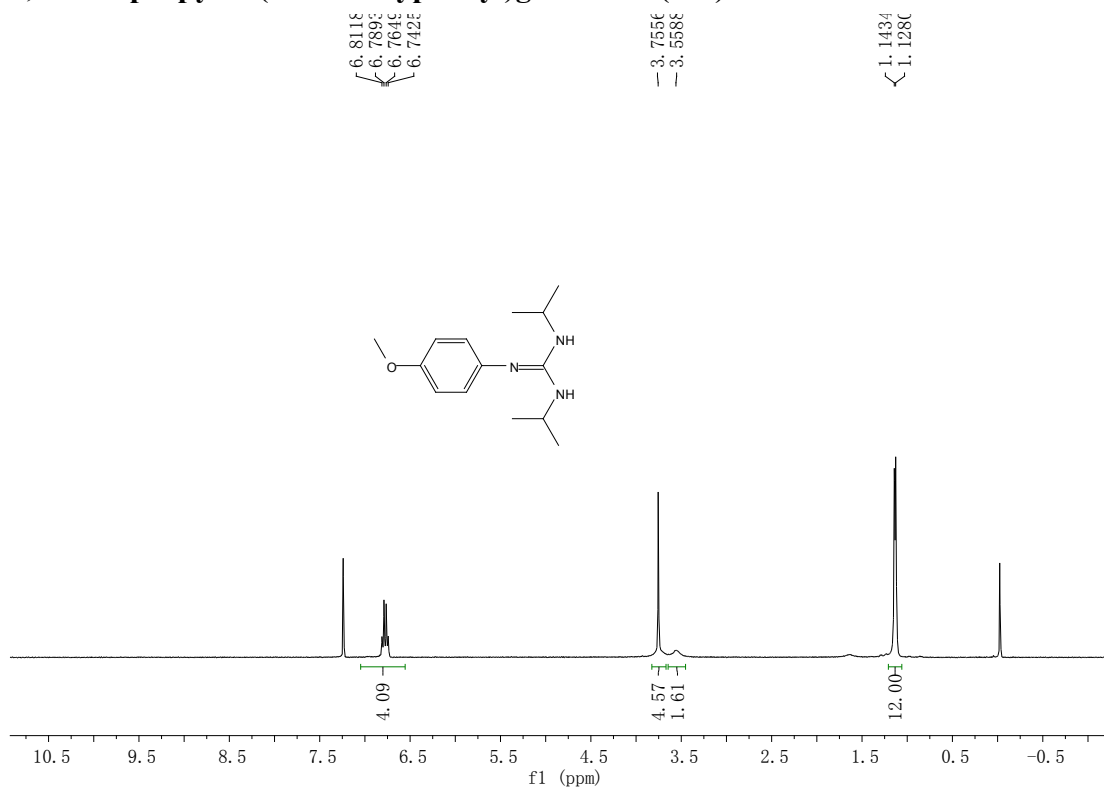

### 1,3-Diisopropyl-2-(p-tolyl)guanidine (13f):

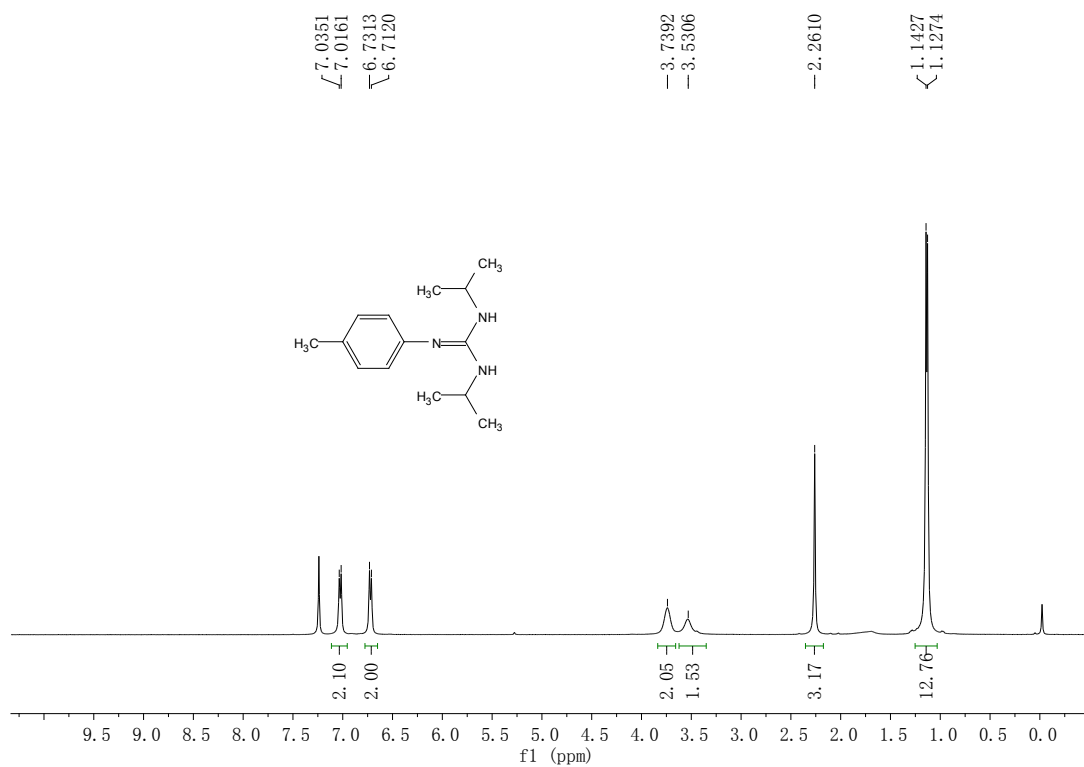



### 1,3-Diisopropyl-2-(m-tolyl)guanidine (13g):

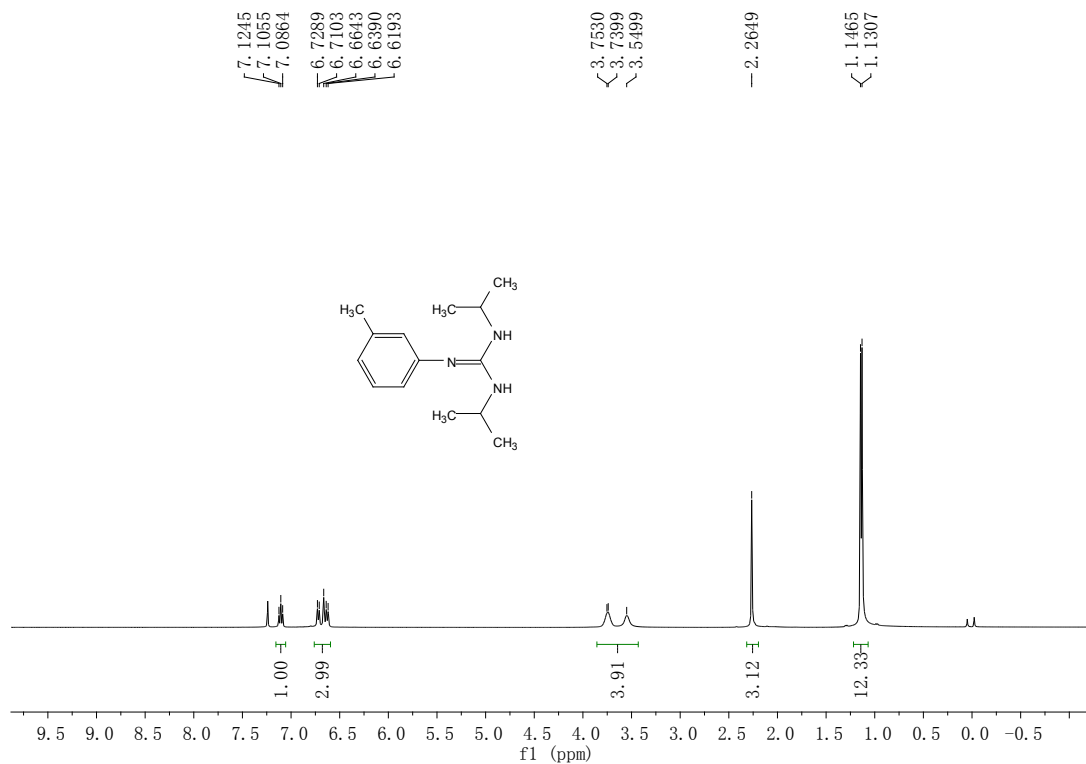

### 1,3-Diisopropyl-2-(o-tolyl)guanidine (13h):

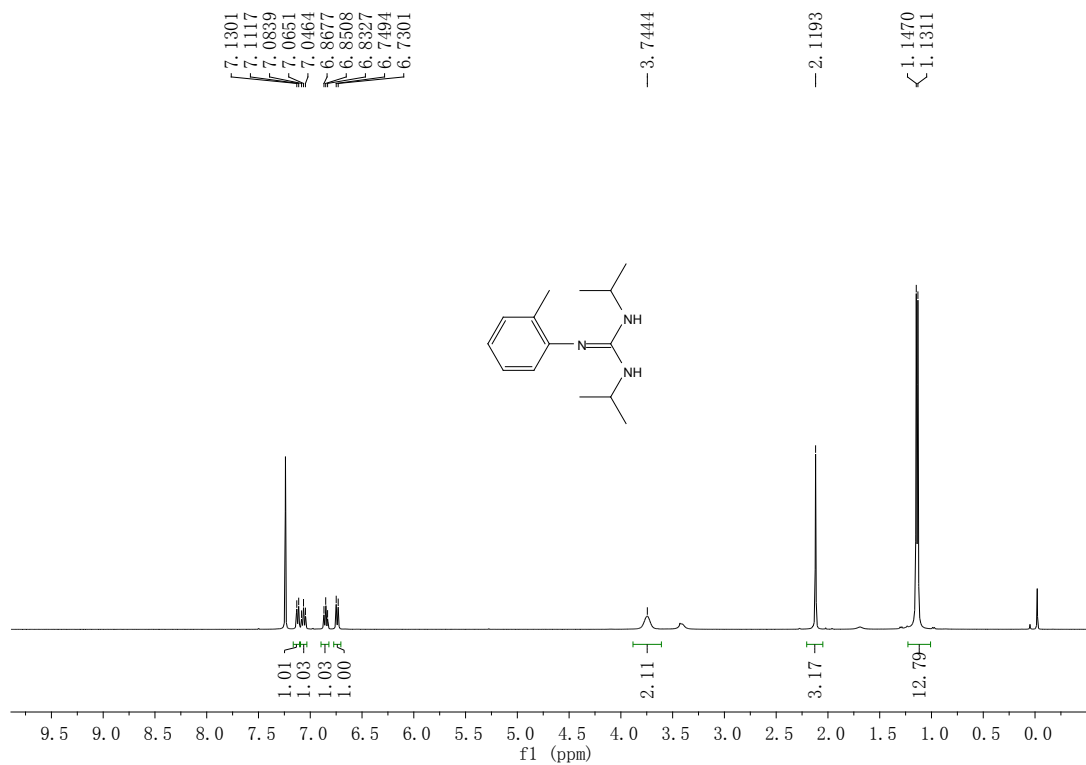

**1,3-Diisopropyl-2-(naphthalen-1-yl)guanidine (13i):**

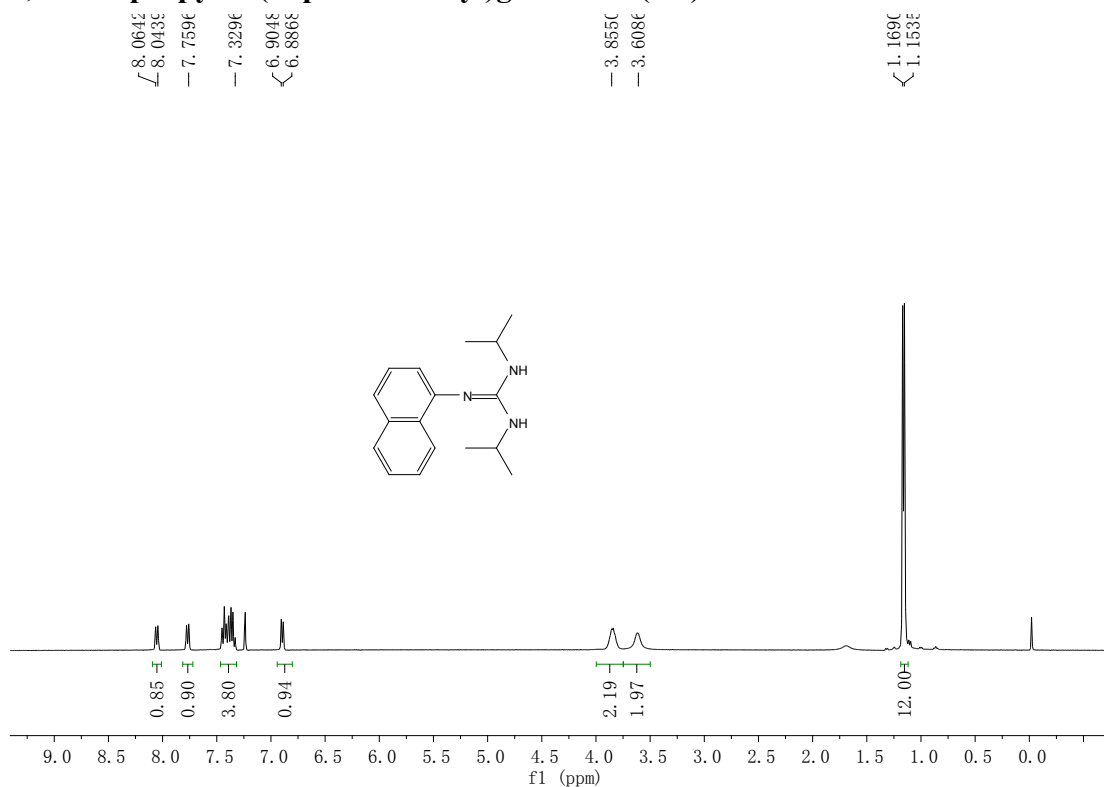

**2-(2-(tert-Butyl)phenyl)-1,3-diisopropylguanidine (13j):**

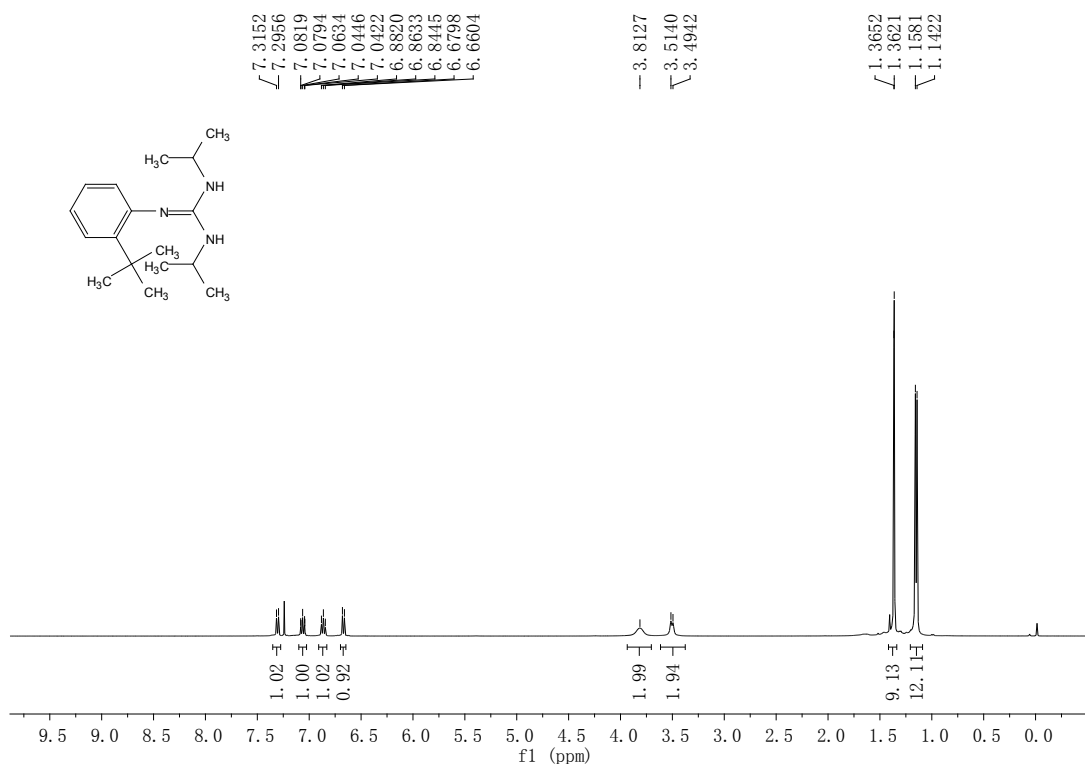

**1,3-Diisopropyl-2-(pyridin-2-yl)guanidine (13k):**

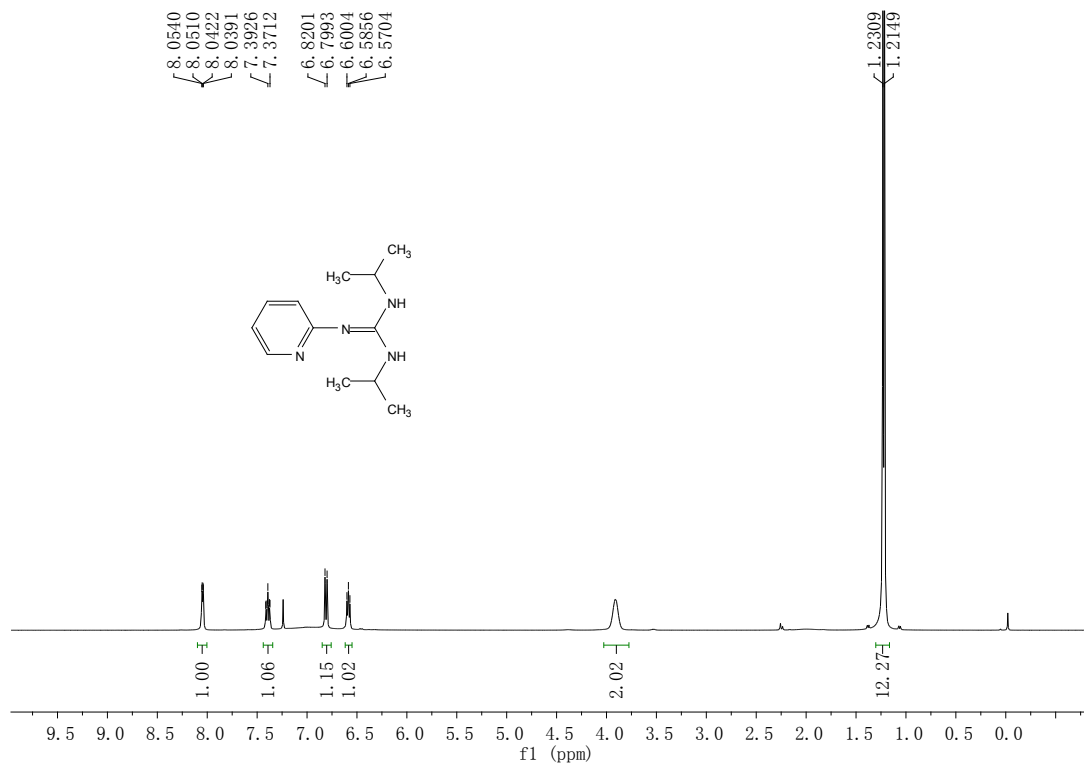

***N, N'*-diisopropyl-*N'*-2, 6-dimethylphenylguanidine (13l):**

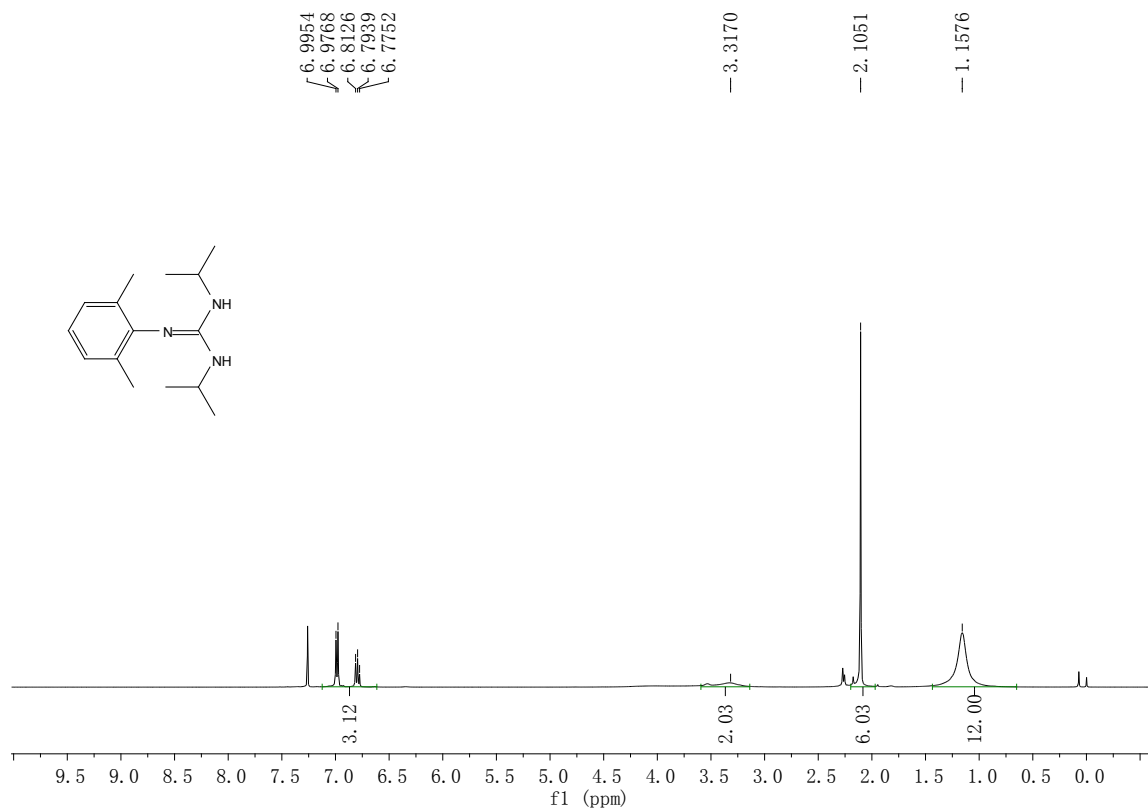

### 1,3-Diisopropyl-2-(4-nitrophenyl)guanidine (13m):

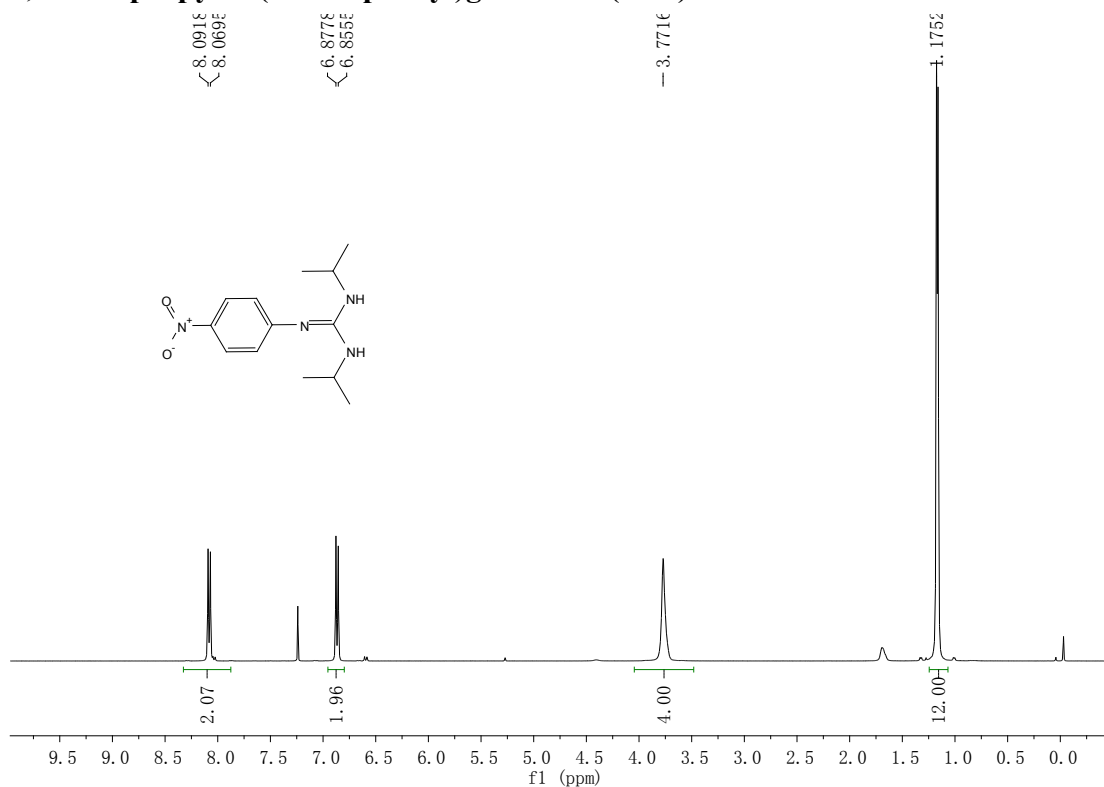

### 1,3-Diisopropyl-2-(4-(trifluoromethyl)phenyl)guanidine (13n):

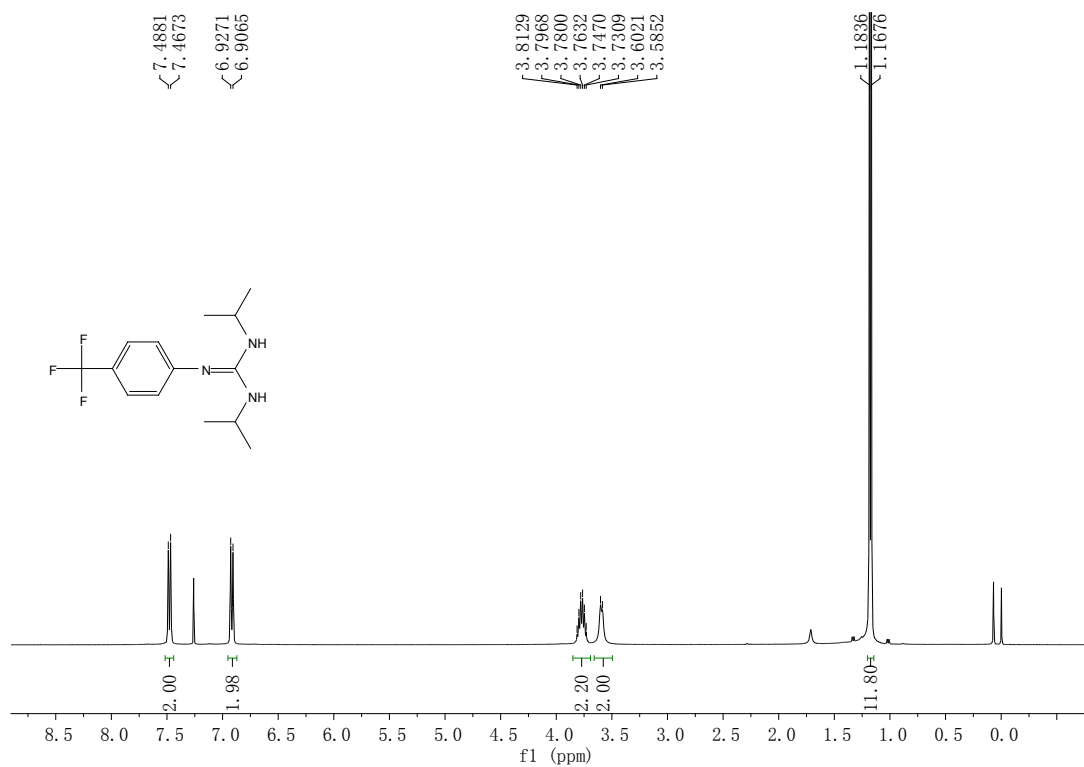

**(Z)-N,N'-Diisopropylmorpholine-4-carboximidamide (13o):**

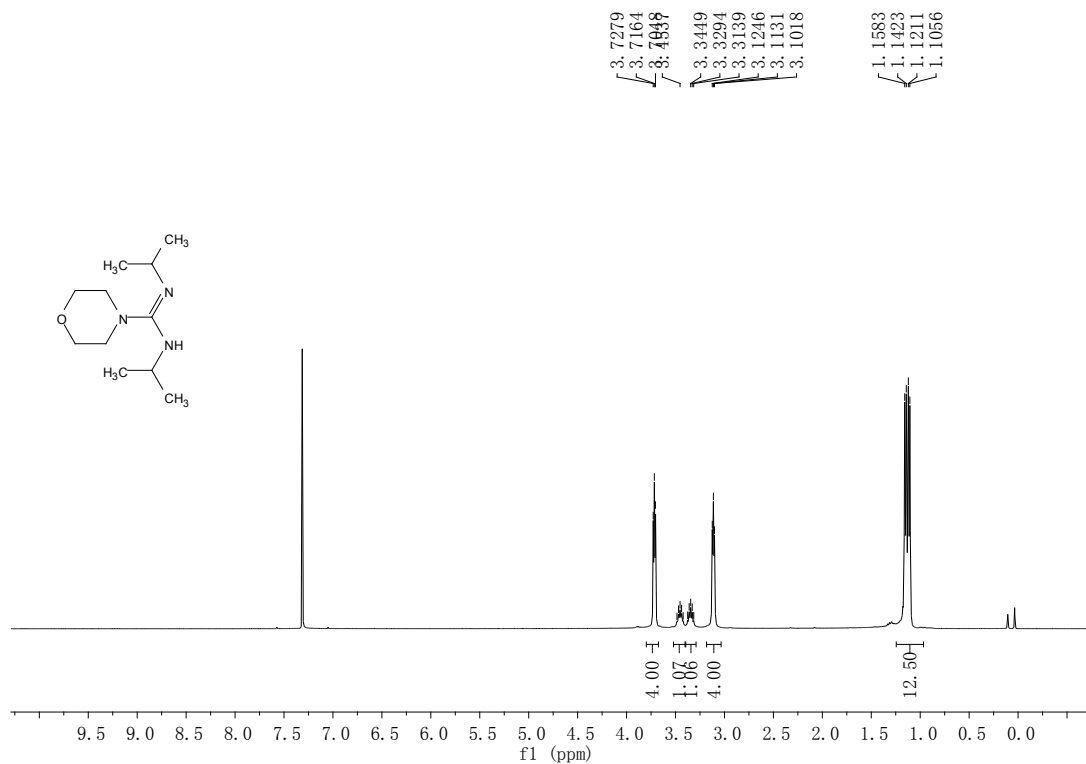

**(Z)-N,N'-Diisopropylpyrrolidine-1-carboximidamide (13p):**

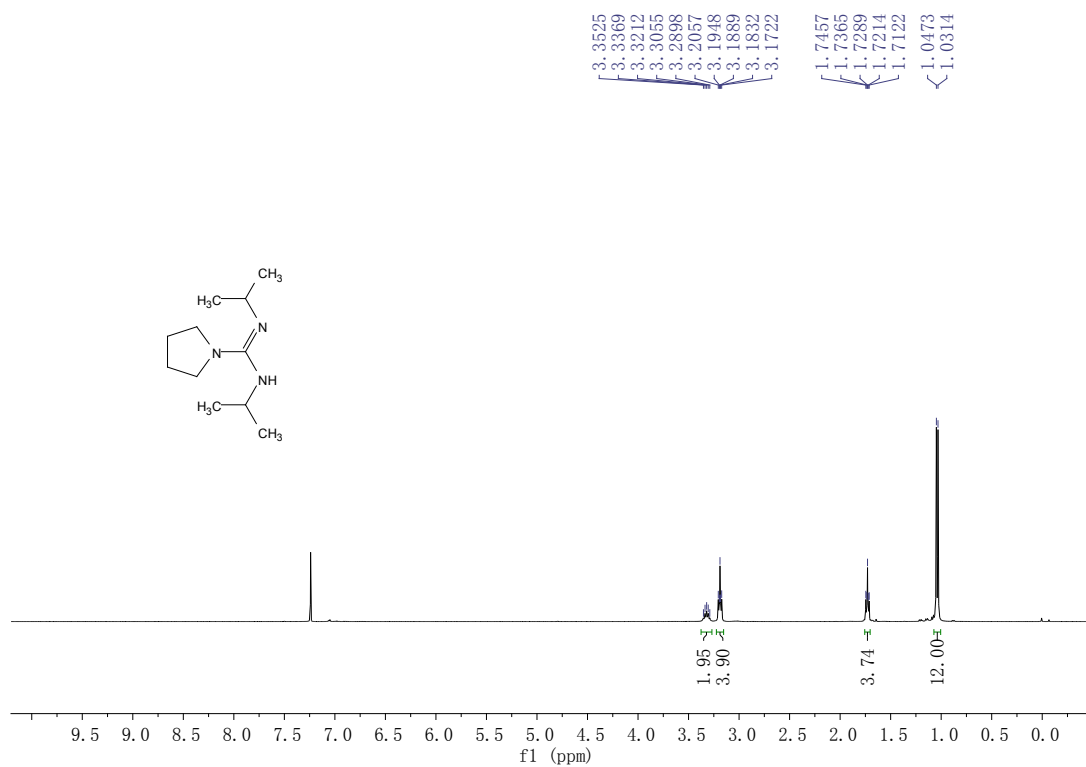

**(Z)-N,N'-Diisopropylindoline-1-carboximidamide (13q):**

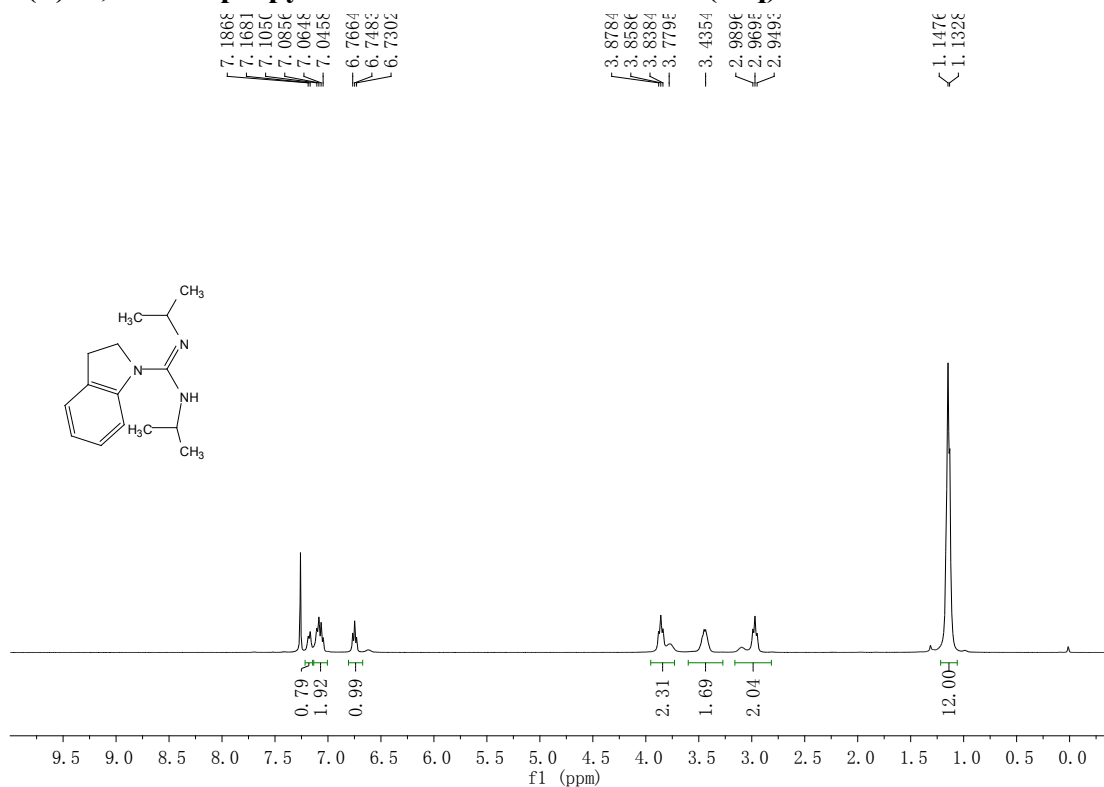

**(Z)-N,N'-Diisopropyl-6-methylindoline-1-carboximidamide (13r):**

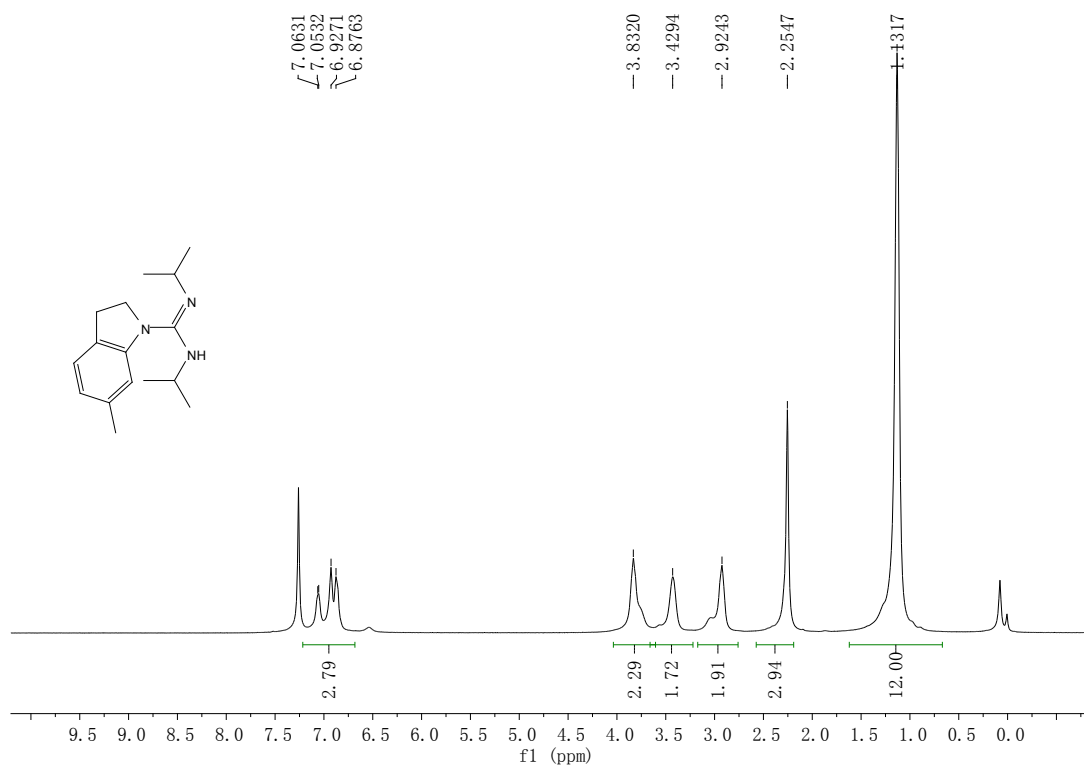

**(1Z, 4Z)-N1,N'1,N4,N'4-tetra-Isopropylpiperazine-1,4-bis(carboximidamide) (13s):**

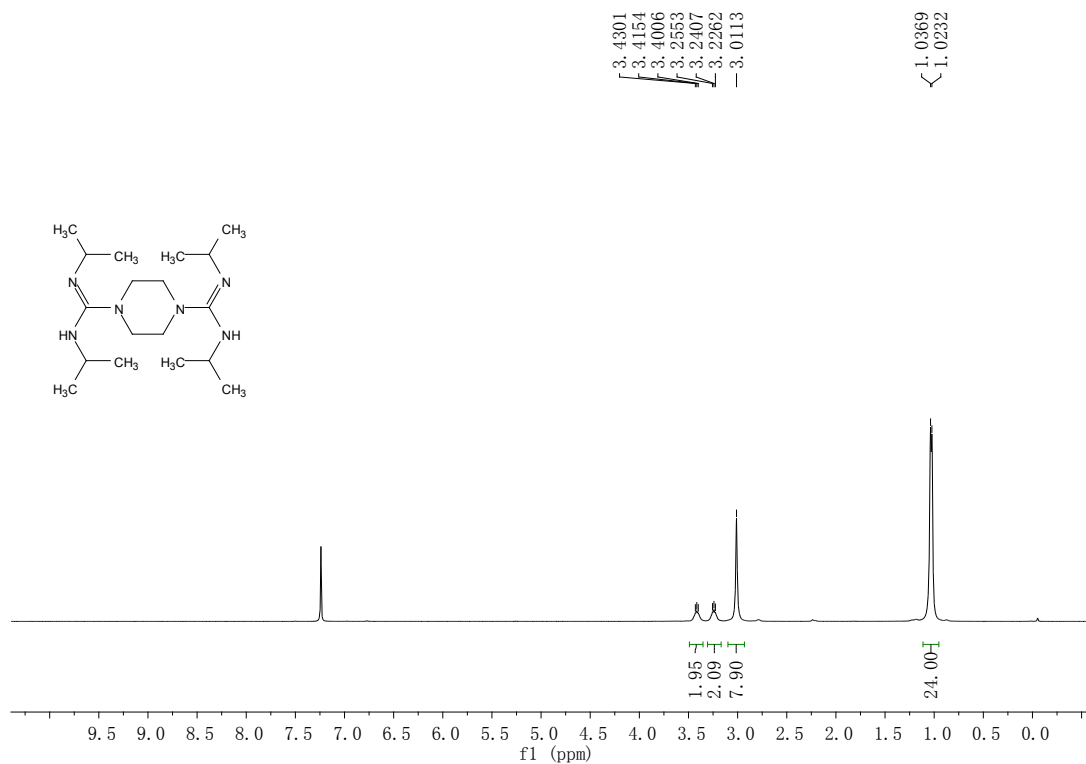

Supplement: c5dt04217h1.pdf [file c5dt04217h1.pdf]
